# Supplementary material
Source: publisher figshare collection journal article supplement (https://tandf.figshare.com/articles/dataset/_/7957142)
Supplement: Supplementary file 1 [file 1]

Archive with 2 entries (2 files):
- taje_a_1587644_sm5558.xls
- taje_a_1587644_sm5557.pdf
