# Supplementary material
Source: publisher figshare collection journal article supplement (https://tandf.figshare.com/articles/dataset/_/7957142)
Supplement: Supplementary file 1 [file 1 › taje_a_1587644_sm5557.pdf]

## **SHRIMP U–Pb phosphate dating shows metamorphism was synchronous with magmatism during the Paleoproterozoic Capricorn Orogeny**

A. M. Piechocka<sup>a\*</sup>, J.-W. Zi<sup>a,b</sup>, C. J. Gregory<sup>a</sup>, S. Sheppard<sup>d</sup>, and B. Rasmussen<sup>c,e</sup>

<sup>a</sup>School of Earth and Planetary Sciences, Curtin University, Kent Street, Bentley, WA 6102, Australia; <sup>b</sup>John de Laeter Centre, Curtin University, Kent Street, Bentley, WA 6102, Australia; <sup>c</sup>State Key Laboratory of Geological Processes and Mineral Resources, China University of Geosciences, Wuhan, 430074, China; <sup>d</sup>Calidus Resources Ltd, Suite 12, 11 Ventnor Avenue, West Perth, WA, 6005, Australia; <sup>e</sup>School of Earth Sciences, The University of Western Australia, Nedlands, WA 6009, Australia

\*e-mail: [nishka.piechocka@postgrad.curtin.edu.au](mailto:nishka.piechocka@postgrad.curtin.edu.au)

Received 14 October 2018; accepted 24 January 2019

A. M. Piechocka: <https://orcid.org/0000-0003-0124-7171>

S. Sheppard: <https://orcid.org/0000-0002-2517-5574>

B Rasmussen: <https://orcid.org/0000-0001-5052-6797>

### **SUPPLEMENTARY PAPERS**

*Australian Journal of Earth Sciences* (2019) 66,  
<https://doi.org/10.1080/08120099.2019.1587644>

---

Copies of Supplementary Papers may be obtained from the Geological Society of Australia's website ([www.gsa.org.au](http://www.gsa.org.au)), the Australian Journal of Earth Sciences website ([www.ajes.com.au](http://www.ajes.com.au)) or from the National Library of Australia's Pandora archive (<https://pandora.nla.gov.au/tep/150555>).

---

### **Supplementary paper**

Table X: SHRIMP data for monazite and xenotime (excel file).
