# Supplementary material
Source: publisher figshare collection journal article supplement (https://tandf.figshare.com/articles/dataset/_/7957142)
Supplement: Supplementary file 1 [file 1 › taje_a_1587644_sm5558.xls]

## Sheet: PlotDat1
Source sheet	table_template	2.98854	0.11423	2.77208	0.122	3.35884	0.103063	3.05223	0.11423	3.05277	0.114135	3.11671	0.113533	3.09177	0.112654	3.04498	0.111964	3.09703	0.111744	3.10954	0.110914	3.27334	0.110702	3.11113	0.110138	3.16082	0.109269	3.12878	0.118463	3.49364	0.113579	3.24366	0.113193
Plot name	Concordia1	2.98846	0.114135	2.77208	0.122	3.31396	0.104187	3.05101	0.114592	3.05153	0.114456	3.11547	0.113806	3.0903	0.112896	3.04361	0.112227	3.09582	0.112013	3.10795	0.111239	3.27168	0.111085	3.10971	0.110398	3.15959	0.109543	3.12677	0.11859	3.49166	0.113972	3.24187	0.113732
Plot Type	1	3.05219	0.113533	2.78833	0.121319	3.27012	0.105325	3.04739	0.11494	3.04787	0.114765	3.1118	0.114068	3.08592	0.11313	3.03954	0.112479	3.09222	0.112272	3.10326	0.111552	3.26677	0.111453	3.10553	0.110649	3.15593	0.109805	3.1208	0.118713	3.48581	0.11435	3.23658	0.11425
1st free col	35	3.01495	0.112654	2.80474	0.120643	3.2273	0.106479	3.0415	0.115261	3.04193	0.115049	3.10583	0.11431	3.07883	0.113344	3.03294	0.112711	3.08638	0.112511	3.09564	0.111841	3.25878	0.111793	3.09872	0.110879	3.14998	0.110047	3.11111	0.118826	3.4763	0.114698	3.22798	0.114727
Sigma Level	1	2.97353	0.111964	2.82132	0.119971	3.18546	0.107649	3.03358	0.115542	3.03393	0.115298	3.09781	0.114522	3.06927	0.113533	3.02405	0.112915	3.07852	0.11272	3.08538	0.112094	3.24804	0.112091	3.08957	0.111082	3.14199	0.11026	3.09808	0.118925	3.4635	0.115003	3.21641	0.115146
Absolute Errs	TRUE	3.03383	0.111744	2.83807	0.119304	3.14456	0.108835	3.02393	0.115773	3.02419	0.115503	3.08803	0.114696	3.05763	0.113687	3.01323	0.113082	3.06894	0.112891	3.07288	0.112301	3.23495	0.112335	3.07841	0.111248	3.13224	0.110434	3.08219	0.119007	3.44791	0.115254	3.20232	0.115489
Symbol Type	1	3.02705	0.110914	2.855	0.118641	3.10458	0.110036	3.01291	0.115944	3.01307	0.115655	3.07688	0.114825	3.04435	0.113802	3.00087	0.113206	3.05802	0.113019	3.05862	0.112456	3.22002	0.112516	3.06569	0.111371	3.12112	0.110563	3.06407	0.119067	3.43012	0.11544	3.18623	0.115744
Inverse Plot	TRUE	3.18696	0.110702	2.8721	0.117983	3.06548	0.111254	3.00097	0.11605	3.00101	0.115748	3.06478	0.114905	3.02994	0.113873	2.98747	0.113283	3.04616	0.113097	3.04315	0.112551	3.20381	0.112628	3.05188	0.111447	3.10906	0.110643	3.04441	0.119104	3.41082	0.115555	3.16878	0.115901
Color Plot	TRUE	3.03752	0.110138	2.88938	0.117329	3.02724	0.112488	2.98854	0.116085	2.98846	0.11578	3.05219	0.114931	3.01495	0.113897	2.97353	0.113309	3.03383	0.113124	3.02705	0.112583	3.18696	0.112666	3.03752	0.111473	3.09651	0.11067	3.02396	0.119117	3.39074	0.115593	3.15064	0.115955
3D plot	FALSE	3.09651	0.109269	2.90684	0.116679	2.98983	0.113739	2.97611	0.11605	2.97592	0.115748	3.0396	0.114905	2.99996	0.113873	2.95959	0.113283	3.0215	0.113097	3.01096	0.112551	3.1701	0.112628	3.02316	0.111447	3.08396	0.110643	3.00351	0.119104	3.37067	0.115555	3.13249	0.115901
Linear	FALSE	3.02396	0.118463	2.92449	0.116034	2.95321	0.115007	2.96417	0.115944	2.96385	0.115655	3.0275	0.114825	2.98555	0.113802	2.94619	0.113206	3.00964	0.113019	2.99549	0.112456	3.1539	0.112516	3.00935	0.111371	3.0719	0.110563	2.98385	0.119067	3.35136	0.11544	3.11504	0.115744
Data Range	G6:J20	3.39074	0.113579	2.94232	0.115393	2.91738	0.116293	2.95315	0.115773	2.95274	0.115503	3.01635	0.114696	2.97227	0.113687	2.93383	0.113082	2.99872	0.112891	2.98123	0.112301	3.13896	0.112335	2.99662	0.111248	3.06078	0.110434	2.96572	0.119007	3.33357	0.115254	3.09895	0.115489
Filled Symbols	TRUE	3.15064	0.113193	2.96035	0.114757	2.88229	0.117595	2.9435	0.115542	2.94299	0.115298	3.00657	0.114522	2.96063	0.113533	2.92301	0.112915	2.98914	0.11272	2.96873	0.112094	3.12587	0.112091	2.98546	0.111082	3.05104	0.11026	2.94984	0.118925	3.31798	0.115003	3.08486	0.115146
ConcAge	FALSE	IsoLine	IsoLine	2.97857	0.114124	2.84793	0.118916	2.93558	0.115261	2.935	0.115049	2.99855	0.11431	2.95108	0.113344	2.91412	0.112711	2.98128	0.112511	2.95847	0.111841	3.11513	0.111793	2.97631	0.110879	3.04304	0.110047	2.9368	0.118826	3.30518	0.114698	3.07329	0.114727
ConcSwap	FALSE			2.99699	0.113496	2.81428	0.120255	2.92969	0.11494	2.92905	0.114765	2.99259	0.114068	2.94398	0.11313	2.90752	0.112479	2.97544	0.112272	2.95085	0.111552	3.10715	0.111453	2.96951	0.110649	3.03709	0.109805	2.92712	0.118713	3.29567	0.11435	3.06469	0.11425
1st Symbol-row	1			3.01561	0.112873	2.78132	0.121611	2.92607	0.114592	2.92539	0.114456	2.98891	0.113806	2.93961	0.112896	2.90345	0.112227	2.97184	0.112013	2.94616	0.111239	3.10223	0.111085	2.96532	0.110398	3.03343	0.109543	2.92115	0.11859	3.28982	0.113972	3.0594	0.113732
				3.03443	0.112253	IsoLine	IsoLine	2.92485	0.11423	2.92416	0.114135	2.98767	0.113533	2.93813	0.112654	2.90208	0.111964	2.97063	0.111744	2.94457	0.110914	3.10057	0.110702	2.9639	0.110138	3.0322	0.109269	2.91914	0.118463	3.28784	0.113579	3.05761	0.113193
				3.05346	0.111637			2.92607	0.113869	2.92539	0.113814	2.98891	0.11326	2.93961	0.112411	2.90345	0.111702	2.97184	0.111475	2.94616	0.110588	3.10223	0.110319	2.96532	0.109877	3.03343	0.108996	2.92115	0.118335	3.28982	0.113186	3.0594	0.112654
				3.07269	0.111026			2.92969	0.113521	2.92905	0.113506	2.99259	0.112998	2.94398	0.112178	2.90752	0.11145	2.97544	0.111216	2.95085	0.110275	3.10715	0.10995	2.96951	0.109627	3.03709	0.108734	2.92712	0.118213	3.29567	0.112808	3.06469	0.112136
				3.09215	0.110419			2.93558	0.1132	2.935	0.113222	2.99855	0.112756	2.95108	0.111963	2.91412	0.111217	2.98128	0.110977	2.95847	0.109987	3.11513	0.109611	2.97631	0.109396	3.04304	0.108491	2.9368	0.1181	3.30518	0.11246	3.07329	0.111659
				3.11182	0.109815			2.9435	0.112919	2.94299	0.112972	3.00657	0.112544	2.96063	0.111775	2.92301	0.111014	2.98914	0.110768	2.96873	0.109734	3.12587	0.109313	2.98546	0.109194	3.05104	0.108279	2.94984	0.118	3.31798	0.112154	3.08486	0.11124
				3.13171	0.109216			2.95315	0.112688	2.95274	0.112768	3.01635	0.11237	2.97227	0.11162	2.93383	0.110846	2.99872	0.110596	2.98123	0.109526	3.13896	0.109069	2.99662	0.109027	3.06078	0.108105	2.96572	0.117919	3.33357	0.111904	3.09895	0.110897
				3.15182	0.108621			2.96417	0.112517	2.96385	0.112616	3.0275	0.112241	2.98555	0.111505	2.94619	0.110722	3.00964	0.110469	2.99549	0.109372	3.1539	0.108888	3.00935	0.108904	3.0719	0.107976	2.98385	0.117859	3.35136	0.111717	3.11504	0.110642
				3.17216	0.10803			2.97611	0.112411	2.97592	0.112522	3.0396	0.112161	2.99996	0.111435	2.95959	0.110646	3.0215	0.11039	3.01096	0.109277	3.1701	0.108776	3.02316	0.108828	3.08396	0.107896	3.00351	0.117821	3.37067	0.111603	3.13249	0.110485
				3.19274	0.107443			2.98854	0.112375	2.98846	0.112491	3.05219	0.112134	3.01495	0.111411	2.97353	0.11062	3.03383	0.110364	3.02705	0.109245	3.18696	0.108738	3.03752	0.108802	3.09651	0.107869	3.02396	0.117809	3.39074	0.111564	3.15064	0.110432
				3.21355	0.106859			3.00097	0.112411	3.00101	0.112522	3.06478	0.112161	3.02994	0.111435	2.98747	0.110646	3.04616	0.11039	3.04315	0.109277	3.20381	0.108776	3.05188	0.108828	3.10906	0.107896	3.04441	0.117821	3.41082	0.111603	3.16878	0.110485
				3.2346	0.10628			3.01291	0.112517	3.01307	0.112616	3.07688	0.112241	3.04435	0.111505	3.00087	0.110722	3.05802	0.110469	3.05862	0.109372	3.22002	0.108888	3.06569	0.108904	3.12112	0.107976	3.06407	0.117859	3.43012	0.111717	3.18623	0.110642
				3.2559	0.105704			3.02393	0.112688	3.02419	0.112768	3.08803	0.11237	3.05763	0.11162	3.01323	0.110846	3.06894	0.110596	3.07288	0.109526	3.23495	0.109069	3.07841	0.109027	3.13224	0.108105	3.08219	0.117919	3.44791	0.111904	3.20232	0.110897
				3.27744	0.105132			3.03358	0.112919	3.03393	0.112972	3.09781	0.112544	3.06927	0.111775	3.02405	0.111014	3.07852	0.110768	3.08538	0.109734	3.24804	0.109313	3.08957	0.109194	3.14199	0.108279	3.09808	0.118	3.4635	0.112154	3.21641	0.11124
				3.29924	0.104564			3.0415	0.1132	3.04193	0.113222	3.10583	0.112756	3.07883	0.111963	3.03294	0.111217	3.08638	0.110977	3.09564	0.109987	3.25878	0.109611	3.09872	0.109396	3.14998	0.108491	3.11111	0.1181	3.4763	0.11246	3.22798	0.111659
				3.32129	0.104			3.04739	0.113521	3.04787	0.113506	3.1118	0.112998	3.08592	0.112178	3.03954	0.11145	3.09222	0.111216	3.10326	0.110275	3.26677	0.10995	3.10553	0.109627	3.15593	0.108734	3.1208	0.118213	3.48581	0.112808	3.23658	0.112136
				3.32129	0.104			3.05101	0.113869	3.05153	0.113814	3.11547	0.11326	3.0903	0.112411	3.04361	0.111702	3.09582	0.111475	3.10795	0.110588	3.27168	0.110319	3.10971	0.109877	3.15959	0.108996	3.12677	0.118335	3.49166	0.113186	3.24187	0.112654
				IsoLine	IsoLine			3.05223	0.11423	3.05277	0.114135	3.11671	0.113533	3.09177	0.112654	3.04498	0.111964	3.09703	0.111744	3.10954	0.110914	3.27334	0.110702	3.11113	0.110138	3.16082	0.109269	3.12878	0.118463	3.49364	0.113579	3.24366	0.113193
								ErrEll	ErrEll	ErrEll	ErrEll	ErrEll	ErrEll	ErrEll	ErrEll	ErrEll	ErrEll	ErrEll	ErrEll	ErrEll	ErrEll	ErrEll	ErrEll	ErrEll	ErrEll	ErrEll	ErrEll	ErrEll	ErrEll	ErrEll	ErrEll	ErrEll	ErrEll

## Sheet: PlotDat2
Source sheet	table_template	3.40743	0.104339	2.9	0.116932	4.29256	0.0865278	3.49911	0.104339	3.50655	0.103971	3.4132	0.103602	3.49615	0.103557	3.43704	0.103538	3.57733	0.103477	3.43679	0.103359	3.39325	0.103247	3.57093	0.103148	3.50553	0.103121	3.60878	0.103046	3.57223	0.102997	3.42512	0.102979	3.43014	0.102912	3.42536	0.102762	3.4669	0.102689	3.61456	0.101429	3.38712	0.102137	3.60888	0.104663	3.62943	0.104616	3.66992	0.103995
Plot name	Concordia2	3.4399	0.103971	2.9	0.116932	4.12267	0.088807	3.49735	0.104586	3.50527	0.104129	3.41191	0.103754	3.49471	0.103643	3.4357	0.10367	3.57542	0.103724	3.43544	0.103432	3.39192	0.103318	3.56912	0.103389	3.50411	0.103235	3.60666	0.1033	3.57033	0.10324	3.42374	0.103049	3.42873	0.102978	3.42402	0.102851	3.4654	0.102828	3.61279	0.101742	3.38577	0.102173	3.60696	0.105043	3.62759	0.104907	3.66803	0.104275
Plot Type	1	3.34607	0.103602	2.93257	0.115742	3.96453	0.0911625	3.49213	0.104824	3.50147	0.104281	3.40809	0.103901	3.49046	0.103726	3.43171	0.103797	3.56976	0.103961	3.43145	0.103502	3.38798	0.103386	3.56374	0.103621	3.49988	0.103345	3.60036	0.103543	3.56469	0.103474	3.41963	0.103116	3.42457	0.103041	3.42003	0.102937	3.46097	0.102961	3.60756	0.102043	3.38177	0.102207	3.60129	0.105408	3.62214	0.105187	3.66243	0.104544
1st free col	59	3.42134	0.103557	2.96577	0.114567	3.81698	0.0935972	3.48366	0.105043	3.49532	0.104421	3.40188	0.104036	3.48354	0.103803	3.42524	0.103914	3.56057	0.104181	3.42497	0.103567	3.38158	0.103448	3.555	0.103835	3.49301	0.103446	3.59014	0.103767	3.55554	0.10369	3.41297	0.103178	3.41782	0.103099	3.41354	0.103016	3.45377	0.103084	3.59906	0.10232	3.37528	0.102239	3.59208	0.105745	3.61329	0.105445	3.65335	0.104792
Sigma Level	1	3.367	0.103538	2.99965	0.113407	3.67899	0.0961139	3.47226	0.105234	3.48703	0.104544	3.39354	0.104154	3.47424	0.10387	3.41653	0.104016	3.5482	0.104373	3.41625	0.103624	3.37296	0.103503	3.54324	0.104022	3.48377	0.103535	3.57638	0.103964	3.54322	0.103879	3.40399	0.103233	3.40873	0.10315	3.40482	0.103086	3.44409	0.103192	3.58762	0.102562	3.36654	0.102267	3.57968	0.10604	3.60138	0.105671	3.64112	0.105009
Absolute Errs	TRUE	3.47786	0.103477	3.0342	0.11226	3.54967	0.0987156	3.45836	0.105392	3.47693	0.104644	3.38336	0.104251	3.4629	0.103925	3.40591	0.1041	3.53313	0.10453	3.40562	0.10367	3.36246	0.103548	3.52892	0.104176	3.4725	0.103608	3.55962	0.104125	3.52821	0.104034	3.39306	0.103277	3.39765	0.103192	3.39419	0.103143	3.4323	0.103281	3.57367	0.102762	3.3559	0.10229	3.56457	0.106282	3.58686	0.105857	3.62621	0.105187
Symbol Type	1	3.36666	0.103359	3.06946	0.111128	3.42822	0.101405	3.44251	0.105509	3.46541	0.104719	3.37176	0.104323	3.44997	0.103966	3.3938	0.104163	3.51593	0.104647	3.3935	0.103705	3.35049	0.103582	3.51257	0.10429	3.45965	0.103662	3.5405	0.104245	3.51109	0.104149	3.38059	0.10331	3.38501	0.103223	3.38207	0.103185	3.41884	0.103347	3.55777	0.10291	3.34375	0.102307	3.54733	0.106462	3.5703	0.105995	3.60921	0.10532
Inverse Plot	TRUE	3.32397	0.103247	3.10544	0.11001	3.31396	0.104187	3.42532	0.105581	3.45291	0.104765	3.35916	0.104367	3.43593	0.103991	3.38066	0.104201	3.49727	0.104719	3.38034	0.103726	3.33749	0.103603	3.49484	0.10436	3.44571	0.103696	3.51974	0.104319	3.4925	0.10422	3.36705	0.103331	3.37129	0.103242	3.36891	0.103211	3.40423	0.103387	3.54051	0.103001	3.33057	0.102318	3.52863	0.106573	3.55233	0.106079	3.59077	0.105401
Color Plot	TRUE	3.47639	0.103148	3.14218	0.108905	3.20626	0.107062	3.40743	0.105605	3.4399	0.104781	3.34607	0.104382	3.42134	0.104	3.367	0.104214	3.47786	0.104744	3.36666	0.103733	3.32397	0.10361	3.47639	0.104384	3.43121	0.103707	3.49816	0.104344	3.47318	0.104244	3.35298	0.103338	3.35703	0.103248	3.35523	0.10322	3.38904	0.103401	3.52256	0.103032	3.31687	0.102321	3.50918	0.10661	3.53365	0.106108	3.57158	0.105429
3D plot	FALSE	3.43121	0.103121	3.17968	0.107814	3.10458	0.110036	3.38954	0.105581	3.4269	0.104765	3.33297	0.104367	3.40674	0.103991	3.35333	0.104201	3.45846	0.104719	3.35298	0.103726	3.31046	0.103603	3.45795	0.10436	3.41671	0.103696	3.47658	0.104319	3.45386	0.10422	3.3389	0.103331	3.34277	0.103242	3.34154	0.103211	3.37385	0.103387	3.50461	0.103001	3.30316	0.102318	3.48973	0.106573	3.51496	0.106079	3.5524	0.105401
Linear	FALSE	3.49816	0.103046	3.21798	0.106736	3.00843	0.113112	3.37234	0.105509	3.4144	0.104719	3.32037	0.104323	3.39271	0.103966	3.34019	0.104163	3.4398	0.104647	3.33983	0.103705	3.29746	0.103582	3.44021	0.10429	3.40277	0.103662	3.45583	0.104245	3.43527	0.104149	3.32536	0.10331	3.32906	0.103223	3.32839	0.103185	3.35925	0.103347	3.48735	0.10291	3.28998	0.102307	3.47102	0.106462	3.497	0.105995	3.53395	0.10532
Data Range	G24:J50	3.47318	0.102997	3.25709	0.105672	2.91738	0.116293	3.35649	0.105392	3.40288	0.104644	3.30877	0.104251	3.37978	0.103925	3.32808	0.1041	3.4226	0.10453	3.3277	0.10367	3.28549	0.103548	3.42387	0.104176	3.38992	0.103608	3.43671	0.104125	3.41815	0.104034	3.31289	0.103277	3.31642	0.103192	3.31626	0.103143	3.34579	0.103281	3.47144	0.102762	3.27784	0.10229	3.45378	0.106282	3.48044	0.105857	3.51695	0.105187
Filled Symbols	TRUE	3.35298	0.102979	3.29706	0.104621	IsoLine	IsoLine	3.3426	0.105234	3.39278	0.104544	3.2986	0.104154	3.36844	0.10387	3.31747	0.104016	3.40753	0.104373	3.31707	0.103624	3.27499	0.103503	3.40954	0.104022	3.37866	0.103535	3.41995	0.103964	3.40314	0.103879	3.30196	0.103233	3.30534	0.10315	3.30563	0.103086	3.33399	0.103192	3.4575	0.102562	3.26719	0.102267	3.43868	0.10604	3.46592	0.105671	3.50205	0.105009
ConcAge	FALSE	3.35703	0.102912	3.3379	0.103582			3.3312	0.105043	3.38449	0.104421	3.29025	0.104036	3.35914	0.103803	3.30876	0.103914	3.39516	0.104181	3.30835	0.103567	3.26637	0.103448	3.39779	0.103835	3.36942	0.103446	3.40619	0.103767	3.39082	0.10369	3.29299	0.103178	3.29625	0.103099	3.29691	0.103016	3.32431	0.103084	3.44606	0.10232	3.25846	0.102239	3.42628	0.105745	3.45401	0.105445	3.48982	0.104792
ConcSwap	FALSE	3.35523	0.102762	3.37964	0.102556			3.32273	0.104824	3.37833	0.104281	3.28404	0.103901	3.35222	0.103726	3.30228	0.103797	3.38597	0.103961	3.30187	0.103502	3.25997	0.103386	3.38905	0.103621	3.36255	0.103345	3.39597	0.103543	3.38167	0.103474	3.28632	0.103116	3.28949	0.103041	3.29043	0.102937	3.31712	0.102961	3.43756	0.102043	3.25196	0.102207	3.41706	0.105408	3.44516	0.105187	3.48073	0.104544
1st Symbol-row	1	3.38904	0.102689	3.42232	0.101543			3.31751	0.104586	3.37454	0.104129	3.28022	0.103754	3.34797	0.103643	3.2983	0.10367	3.38031	0.103724	3.29788	0.103432	3.25603	0.103318	3.38367	0.103389	3.35832	0.103235	3.38967	0.1033	3.37603	0.10324	3.28221	0.103049	3.28533	0.102978	3.28644	0.102851	3.31269	0.102828	3.43232	0.101742	3.24797	0.102173	3.41139	0.105043	3.43971	0.104907	3.47513	0.104275
		3.52256	0.101429	3.46596	0.100542			3.31575	0.104339	3.37326	0.103971	3.27893	0.103602	3.34653	0.103557	3.29695	0.103538	3.37839	0.103477	3.29653	0.103359	3.2547	0.103247	3.38185	0.103148	3.35689	0.103121	3.38755	0.103046	3.37413	0.102997	3.28083	0.102979	3.28393	0.102912	3.28509	0.102762	3.31119	0.102689	3.43056	0.101429	3.24662	0.102137	3.40947	0.104663	3.43787	0.104616	3.47325	0.103995
		3.31687	0.102137	3.51061	0.0995531			3.31751	0.104092	3.37454	0.103813	3.28022	0.10345	3.34797	0.103471	3.2983	0.103406	3.38031	0.103229	3.29788	0.103286	3.25603	0.103177	3.38367	0.102906	3.35832	0.103007	3.38967	0.102793	3.37603	0.102754	3.28221	0.102909	3.28533	0.102847	3.28644	0.102672	3.31269	0.10255	3.43232	0.101117	3.24797	0.102101	3.41139	0.104283	3.43971	0.104325	3.47513	0.103715
		3.50918	0.104663	3.55628	0.0985764			3.32273	0.103855	3.37833	0.103661	3.28404	0.103304	3.35222	0.103388	3.30228	0.10328	3.38597	0.102992	3.30187	0.103216	3.25997	0.103109	3.38905	0.102674	3.36255	0.102897	3.39597	0.10255	3.38167	0.10252	3.28632	0.102841	3.28949	0.102784	3.29043	0.102586	3.31712	0.102416	3.43756	0.100816	3.25196	0.102066	3.41706	0.103918	3.44516	0.104045	3.48073	0.103446
		3.53365	0.104616	3.60303	0.0976115			3.3312	0.103636	3.38449	0.103521	3.29025	0.103169	3.35914	0.103311	3.30876	0.103163	3.39516	0.102773	3.30835	0.103152	3.26637	0.103046	3.39779	0.102461	3.36942	0.102796	3.40619	0.102326	3.39082	0.102304	3.29299	0.102779	3.29625	0.102726	3.29691	0.102507	3.32431	0.102293	3.44606	0.100539	3.25846	0.102034	3.42628	0.103581	3.45401	0.103787	3.48982	0.103198
		3.57158	0.103995	3.65088	0.0966584			3.3426	0.103444	3.39278	0.103399	3.2986	0.103051	3.36844	0.103244	3.31747	0.10306	3.40753	0.102581	3.31707	0.103095	3.27499	0.102991	3.40954	0.102273	3.37866	0.102707	3.41995	0.102129	3.40314	0.102115	3.30196	0.102725	3.30534	0.102675	3.30563	0.102437	3.33399	0.102185	3.4575	0.100296	3.26719	0.102006	3.43868	0.103286	3.46592	0.103561	3.50205	0.102981
		3.56264	0.104014	3.69987	0.0957169			3.35649	0.103287	3.40288	0.103298	3.30877	0.102954	3.37978	0.103189	3.32808	0.102976	3.4226	0.102423	3.3277	0.103049	3.28549	0.102946	3.42387	0.102119	3.38992	0.102634	3.43671	0.101968	3.41815	0.10196	3.31289	0.10268	3.31642	0.102633	3.31626	0.10238	3.34579	0.102096	3.47144	0.100097	3.27784	0.101983	3.45378	0.103044	3.48044	0.103375	3.51695	0.102802
		3.62053	0.104162	3.75006	0.0947867			3.37234	0.10317	3.4144	0.103223	3.32037	0.102882	3.39271	0.103148	3.34019	0.102914	3.4398	0.102306	3.33983	0.103014	3.29746	0.102912	3.44021	0.102005	3.40277	0.10258	3.45583	0.101848	3.43527	0.101845	3.32536	0.102647	3.32906	0.102602	3.32839	0.102338	3.35925	0.102031	3.48735	0.099949	3.28998	0.101966	3.47102	0.102864	3.497	0.103238	3.53395	0.10267
		3.76284	0.106436	3.80147	0.0938679			3.38954	0.103098	3.4269	0.103177	3.33297	0.102838	3.40674	0.103123	3.35333	0.102875	3.45846	0.102234	3.35298	0.102993	3.31046	0.102892	3.45795	0.101935	3.41671	0.102547	3.47658	0.101774	3.45386	0.101774	3.3389	0.102627	3.34277	0.102583	3.34154	0.102312	3.37385	0.10199	3.50461	0.0998579	3.30316	0.101956	3.48973	0.102753	3.51496	0.103153	3.5524	0.102588
		3.33217	0.0956943	3.85416	0.0929602			3.40743	0.103074	3.4399	0.103161	3.34607	0.102823	3.42134	0.103115	3.367	0.102862	3.47786	0.102209	3.36666	0.102986	3.32397	0.102885	3.47639	0.101911	3.43121	0.102535	3.49816	0.101749	3.47318	0.10175	3.35298	0.10262	3.35703	0.102577	3.35523	0.102303	3.38904	0.101976	3.52256	0.0998271	3.31687	0.101952	3.50918	0.102715	3.53365	0.103124	3.57158	0.102561
		IsoLine	IsoLine	3.90818	0.0920634			3.42532	0.103098	3.45291	0.103177	3.35916	0.102838	3.43593	0.103123	3.38066	0.102875	3.49727	0.102234	3.38034	0.102993	3.33749	0.102892	3.49484	0.101935	3.44571	0.102547	3.51974	0.101774	3.4925	0.101774	3.36705	0.102627	3.37129	0.102583	3.36891	0.102312	3.40423	0.10199	3.54051	0.0998579	3.33057	0.101956	3.52863	0.102753	3.55233	0.103153	3.59077	0.102588
				3.96357	0.0911775			3.44251	0.10317	3.46541	0.103223	3.37176	0.102882	3.44997	0.103148	3.3938	0.102914	3.51593	0.102306	3.3935	0.103014	3.35049	0.102912	3.51257	0.102005	3.45965	0.10258	3.5405	0.101848	3.51109	0.101845	3.38059	0.102647	3.38501	0.102602	3.38207	0.102338	3.41884	0.102031	3.55777	0.099949	3.34375	0.101966	3.54733	0.102864	3.5703	0.103238	3.60921	0.10267
				4.0204	0.0903023			3.45836	0.103287	3.47693	0.103298	3.38336	0.102954	3.4629	0.103189	3.40591	0.102976	3.53313	0.102423	3.40562	0.103049	3.36246	0.102946	3.52892	0.102119	3.4725	0.102634	3.55962	0.101968	3.52821	0.10196	3.39306	0.10268	3.39765	0.102633	3.39419	0.10238	3.4323	0.102096	3.57367	0.100097	3.3559	0.101983	3.56457	0.103044	3.58686	0.103375	3.62621	0.102802
				4.0787	0.0894377			3.47226	0.103444	3.48703	0.103399	3.39354	0.103051	3.47424	0.103244	3.41653	0.10306	3.5482	0.102581	3.41625	0.103095	3.37296	0.102991	3.54324	0.102273	3.48377	0.102707	3.57638	0.102129	3.54322	0.102115	3.40399	0.102725	3.40873	0.102675	3.40482	0.102437	3.44409	0.102185	3.58762	0.100296	3.36654	0.102006	3.57968	0.103286	3.60138	0.103561	3.64112	0.102981
				4.13855	0.0885835			3.48366	0.103636	3.49532	0.103521	3.40188	0.103169	3.48354	0.103311	3.42524	0.103163	3.56057	0.102773	3.42497	0.103152	3.38158	0.103046	3.555	0.102461	3.49301	0.102796	3.59014	0.102326	3.55554	0.102304	3.41297	0.102779	3.41782	0.102726	3.41354	0.102507	3.45377	0.102293	3.59906	0.100539	3.37528	0.102034	3.59208	0.103581	3.61329	0.103787	3.65335	0.103198
				4.2	0.0877395			3.49213	0.103855	3.50147	0.103661	3.40809	0.103304	3.49046	0.103388	3.43171	0.10328	3.56976	0.102992	3.43145	0.103216	3.38798	0.103109	3.56374	0.102674	3.49988	0.102897	3.60036	0.10255	3.56469	0.10252	3.41963	0.102841	3.42457	0.102784	3.42003	0.102586	3.46097	0.102416	3.60756	0.100816	3.38177	0.102066	3.60129	0.103918	3.62214	0.104045	3.66243	0.103446
				4.2	0.0877395			3.49735	0.104092	3.50527	0.103813	3.41191	0.10345	3.49471	0.103471	3.4357	0.103406	3.57542	0.103229	3.43544	0.103286	3.39192	0.103177	3.56912	0.102906	3.50411	0.103007	3.60666	0.102793	3.57033	0.102754	3.42374	0.102909	3.42873	0.102847	3.42402	0.102672	3.4654	0.10255	3.61279	0.101117	3.38577	0.102101	3.60696	0.104283	3.62759	0.104325	3.66803	0.103715
				IsoLine	IsoLine			3.49911	0.104339	3.50655	0.103971	3.4132	0.103602	3.49615	0.103557	3.43704	0.103538	3.57733	0.103477	3.43679	0.103359	3.39325	0.103247	3.57093	0.103148	3.50553	0.103121	3.60878	0.103046	3.57223	0.102997	3.42512	0.102979	3.43014	0.102912	3.42536	0.102762	3.4669	0.102689	3.61456	0.101429	3.38712	0.102137	3.60888	0.104663	3.62943	0.104616	3.66992	0.103995
								ErrEll	ErrEll	ErrEll	ErrEll	ErrEll	ErrEll	ErrEll	ErrEll	ErrEll	ErrEll	ErrEll	ErrEll	ErrEll	ErrEll	ErrEll	ErrEll	ErrEll	ErrEll	ErrEll	ErrEll	ErrEll	ErrEll	ErrEll	ErrEll	ErrEll	ErrEll	ErrEll	ErrEll	ErrEll	ErrEll	ErrEll	ErrEll	ErrEll	ErrEll	ErrEll	ErrEll	ErrEll	ErrEll	ErrEll	ErrEll	ErrEll	ErrEll
[truncated: 8 more columns]

## Sheet: PlotDat3
Source sheet	table_template	5.88431	0.0745551	3.5	0.0997849	10.2518	0.059901	6.03736	0.0745551	6.01144	0.0742078	5.89675	0.0741632	5.79419	0.0737856	6.14775	0.07318	6.35018	0.0731032	5.97019	0.0728957	5.97522	0.0728455	5.96805	0.0728325	6.27435	0.0726824	5.90931	0.0722759	6.24298	0.0716935	5.95268	0.0716659	5.83951	0.0764585	6.56603	0.0759148	5.69886	0.0721373	5.74417	0.0720831	6.2043	0.0742425	8.00934	0.0959796
Plot name	Concordia3	5.89025	0.0742078	3.5	0.0997849	8.71821	0.0627568	6.03442	0.074779	6.00911	0.0743966	5.89402	0.0743646	5.79063	0.0741083	6.1457	0.0733832	6.3465	0.0734076	5.96818	0.0732967	5.97324	0.0730618	5.96574	0.0730465	6.27211	0.0728794	5.90645	0.0725283	6.24036	0.0719161	5.95036	0.0719188	5.83676	0.0767859	6.56217	0.0762224	5.69604	0.0726316	5.74204	0.0723421	6.20093	0.0749321	7.98003	0.0968674
Plot Type	1	5.75468	0.0741632	3.58388	0.0980025	7.56836	0.0657994	6.02571	0.0749943	6.00221	0.0745782	5.88594	0.0745583	5.78008	0.0744187	6.13965	0.0735786	6.33559	0.0737003	5.96221	0.0736824	5.9674	0.0732697	5.95888	0.0732523	6.26545	0.0730687	5.89799	0.072771	6.23261	0.0721301	5.94347	0.072162	5.82861	0.0771006	6.55076	0.0765182	5.68768	0.0731069	5.73575	0.0725912	6.19094	0.0755953	7.8932	0.0977211
1st free col	47	5.6089	0.0737856	3.67142	0.0962595	6.67431	0.0690422	6.01157	0.0751926	5.99101	0.0747455	5.87281	0.0747368	5.76296	0.0747047	6.12982	0.0737587	6.31789	0.07397	5.95252	0.0740378	5.95792	0.0734613	5.94775	0.0734419	6.25464	0.0732432	5.88424	0.0729947	6.22002	0.0723274	5.93228	0.0723861	5.81537	0.0773907	6.53222	0.0767907	5.67412	0.0735449	5.72553	0.0728207	6.17473	0.0762064	7.75221	0.0985079
Sigma Level	1	6.04137	0.07318	3.76285	0.094555	5.95934	0.0724996	5.99253	0.0753665	5.97594	0.0748922	5.85514	0.0748932	5.73992	0.0749554	6.11659	0.0739165	6.29406	0.0742065	5.93949	0.0743494	5.94515	0.0736293	5.93276	0.0736082	6.2401	0.0733961	5.86575	0.0731907	6.20309	0.0725003	5.91722	0.0725826	5.79757	0.077645	6.50728	0.0770297	5.65586	0.0739288	5.71177	0.0730219	6.15291	0.076742	7.56247	0.0991975
Absolute Errs	TRUE	6.15856	0.0731032	3.85843	0.0928882	5.37459	0.0761874	5.96934	0.0755092	5.95758	0.0750125	5.83361	0.0750216	5.71184	0.0751612	6.10047	0.074046	6.26502	0.0744005	5.9236	0.074605	5.9296	0.0737671	5.9145	0.0737446	6.22237	0.0735217	5.84321	0.0733516	6.18245	0.0726422	5.89887	0.0727438	5.77586	0.0778536	6.47689	0.0772257	5.63361	0.0742439	5.69501	0.073187	6.12632	0.0771816	7.33127	0.0997635
Symbol Type	1	5.86537	0.0728957	3.95846	0.091258	4.88752	0.0801223	5.94288	0.0756153	5.93663	0.0751019	5.80905	0.075117	5.6798	0.0753141	6.08208	0.0741423	6.23189	0.0745447	5.90548	0.074795	5.91185	0.0738695	5.89367	0.073846	6.20215	0.0736149	5.8175	0.0734712	6.1589	0.0727476	5.87794	0.0728636	5.75111	0.0780087	6.44221	0.0773714	5.60823	0.0744781	5.67589	0.0733097	6.09599	0.0775083	7.06749	0.100184
Inverse Plot	TRUE	5.87258	0.0728455	4.06325	0.0896636	4.47557	0.0843223	5.91417	0.0756806	5.9139	0.075157	5.78239	0.0751758	5.64505	0.0754082	6.06212	0.0742016	6.19594	0.0746335	5.88582	0.074912	5.8926	0.0739326	5.87107	0.0739084	6.18021	0.0736724	5.78959	0.0735448	6.13336	0.0728125	5.85523	0.0729374	5.72424	0.0781042	6.40458	0.0774612	5.58069	0.0746222	5.65514	0.0733853	6.06308	0.0777095	6.78128	0.100443
Color Plot	TRUE	5.84756	0.0728325	4.17316	0.0881042	4.12267	0.088807	5.88431	0.0757026	5.89025	0.0751756	5.75468	0.0751956	5.6089	0.07544	6.04137	0.0742216	6.15856	0.0746635	5.86537	0.0749515	5.87258	0.0739539	5.84756	0.0739295	6.15739	0.0736918	5.76058	0.0735696	6.10679	0.0728344	5.83161	0.0729623	5.6963	0.0781364	6.36545	0.0774915	5.55205	0.0746709	5.63356	0.0734108	6.02885	0.0777774	6.48363	0.10053
3D plot	FALSE	6.15739	0.0726824	4.28855	0.0865789	3.81698	0.0935972	5.85445	0.0756806	5.86661	0.075157	5.72696	0.0751758	5.57275	0.0754082	6.02062	0.0742016	6.12118	0.0746335	5.84492	0.074912	5.85255	0.0739326	5.82405	0.0739084	6.13457	0.0736724	5.73156	0.0735448	6.08022	0.0728125	5.80799	0.0729374	5.66837	0.0781042	6.32632	0.0774612	5.52341	0.0746222	5.61198	0.0733853	5.99462	0.0777095	6.18598	0.100443
Linear	FALSE	5.76058	0.0722759	4.40985	0.085087	3.54967	0.0987156	5.82574	0.0756153	5.84388	0.0751019	5.70031	0.075117	5.53799	0.0753141	6.00066	0.0741423	6.08523	0.0745447	5.82525	0.074795	5.8333	0.0738695	5.80145	0.073846	6.11263	0.0736149	5.70366	0.0734712	6.05467	0.0727476	5.78528	0.0728636	5.6415	0.0780087	6.2887	0.0773714	5.49587	0.0744781	5.59123	0.0733097	5.96171	0.0775083	5.89976	0.100184
Data Range	G54:J73	6.10679	0.0716935	4.53753	0.0836277	IsoLine	IsoLine	5.79928	0.0755092	5.82293	0.0750125	5.67574	0.0750216	5.50596	0.0751612	5.98227	0.074046	6.05211	0.0744005	5.80713	0.074605	5.81555	0.0737671	5.78062	0.0737446	6.0924	0.0735217	5.67795	0.0733516	6.03112	0.0726422	5.76435	0.0727438	5.61674	0.0778536	6.25402	0.0772257	5.47048	0.0742439	5.57211	0.073187	5.93137	0.0771816	5.63599	0.0997635
Filled Symbols	TRUE	5.83161	0.0716659	4.6721	0.0822001			5.77609	0.0753665	5.80457	0.0748922	5.65421	0.0748932	5.47788	0.0749554	5.96615	0.0739165	6.02307	0.0742065	5.79125	0.0743494	5.8	0.0736293	5.76236	0.0736082	6.07468	0.0733961	5.65541	0.0731907	6.01049	0.0725003	5.746	0.0725826	5.59504	0.077645	6.22362	0.0770297	5.44824	0.0739288	5.55535	0.0730219	5.90479	0.076742	5.40478	0.0991975
ConcAge	FALSE	5.6963	0.0764585	4.81412	0.0808036			5.75706	0.0751926	5.7895	0.0747455	5.63655	0.0747368	5.45484	0.0747047	5.95292	0.0737587	5.99924	0.07397	5.77821	0.0740378	5.78723	0.0734613	5.74737	0.0734419	6.06013	0.0732432	5.63692	0.0729947	5.99355	0.0723274	5.73094	0.0723861	5.57723	0.0773907	6.19868	0.0767907	5.42998	0.0735449	5.54159	0.0728207	5.88297	0.0762064	5.21504	0.0985079
ConcSwap	FALSE	6.36545	0.0759148	4.96425	0.0794374			5.74291	0.0749943	5.7783	0.0745782	5.62342	0.0745583	5.43771	0.0744187	5.94309	0.0735786	5.98153	0.0737003	5.76852	0.0736824	5.77775	0.0732697	5.73624	0.0732523	6.04932	0.0730687	5.62317	0.072771	5.98096	0.0721301	5.71976	0.072162	5.564	0.0771006	6.18015	0.0765182	5.41641	0.0731069	5.53137	0.0725912	5.86675	0.0755953	5.07405	0.0977211
1st Symbol-row	1	5.55205	0.0721373	5.12318	0.0781007			5.7342	0.074779	5.7714	0.0743966	5.61533	0.0743646	5.42717	0.0741083	5.93704	0.0733832	5.97063	0.0734076	5.76256	0.0732967	5.77191	0.0730618	5.72938	0.0730465	6.04267	0.0728794	5.61471	0.0725283	5.97321	0.0719161	5.71287	0.0719188	5.55585	0.0767859	6.16873	0.0762224	5.40806	0.0726316	5.52508	0.0723421	5.85677	0.0749321	4.98723	0.0968674
		5.63356	0.0720831	5.29171	0.076793			5.73126	0.0745551	5.76907	0.0742078	5.6126	0.0741632	5.42361	0.0737856	5.93499	0.07318	5.96695	0.0731032	5.76055	0.0728957	5.76994	0.0728455	5.72706	0.0728325	6.04042	0.0726824	5.61185	0.0722759	5.9706	0.0716935	5.71054	0.0716659	5.5531	0.0764585	6.16488	0.0759148	5.40524	0.0721373	5.52295	0.0720831	5.8534	0.0742425	4.95791	0.0959796
		6.02885	0.0742425	5.47074	0.0755135			5.7342	0.0743312	5.7714	0.074019	5.61533	0.0739618	5.42717	0.0734628	5.93704	0.0729768	5.97063	0.0727988	5.76256	0.0724946	5.77191	0.0726293	5.72938	0.0726184	6.04267	0.0724855	5.61471	0.0720235	5.97321	0.0714709	5.71287	0.071413	5.55585	0.0761312	6.16873	0.0756072	5.40806	0.071643	5.52508	0.071824	5.85677	0.0735529	4.98723	0.0950918
		6.48363	0.0959796	5.66127	0.0742616			5.74291	0.074116	5.7783	0.0738375	5.62342	0.0737681	5.43771	0.0731524	5.94309	0.0727814	5.98153	0.0725061	5.76852	0.0721089	5.77775	0.0724214	5.73624	0.0724126	6.04932	0.0722962	5.62317	0.0717808	5.98096	0.0712569	5.71976	0.0711698	5.564	0.0758164	6.18015	0.0753114	5.41641	0.0711677	5.53137	0.0715749	5.86675	0.0728898	5.07405	0.0942381
		IsoLine	IsoLine	5.86446	0.0730366			5.75706	0.0739176	5.7895	0.0736702	5.63655	0.0735896	5.45484	0.0728664	5.95292	0.0726013	5.99924	0.0722364	5.77821	0.0717535	5.78723	0.0722298	5.74737	0.072223	6.06013	0.0721217	5.63692	0.0715571	5.99355	0.0710596	5.73094	0.0709456	5.57723	0.0755263	6.19868	0.0750389	5.42998	0.0707297	5.54159	0.0713454	5.88297	0.0722787	5.21504	0.0934513
				6.0816	0.0718379			5.77609	0.0737437	5.80457	0.0735235	5.65421	0.0734332	5.47788	0.0726157	5.96615	0.0724435	6.02307	0.0719999	5.79125	0.071442	5.8	0.0720618	5.76236	0.0720567	6.07468	0.0719687	5.65541	0.0713611	6.01049	0.0708867	5.746	0.0707492	5.59504	0.075272	6.22362	0.0747999	5.44824	0.0703457	5.55535	0.0711442	5.90479	0.071743	5.40478	0.0927617
				6.31417	0.0706648			5.79928	0.073601	5.82293	0.0734032	5.67574	0.0733048	5.50596	0.0724099	5.98227	0.072314	6.05211	0.0718059	5.80713	0.0711863	5.81555	0.071924	5.78062	0.0719203	6.0924	0.0718432	5.67795	0.0712002	6.03112	0.0707448	5.76435	0.070588	5.61674	0.0750634	6.25402	0.0746039	5.47048	0.0700307	5.57211	0.0709791	5.93137	0.0713034	5.63599	0.0921957
				6.56388	0.0695169			5.82574	0.0734949	5.84388	0.0733137	5.70031	0.0732094	5.53799	0.0722571	6.00066	0.0722177	6.08523	0.0716617	5.82525	0.0709963	5.8333	0.0718216	5.80145	0.0718189	6.11263	0.0717499	5.70366	0.0710806	6.05467	0.0706394	5.78528	0.0704682	5.6415	0.0749083	6.2887	0.0744582	5.49587	0.0697965	5.59123	0.0708564	5.96171	0.0709767	5.89976	0.0917752
				6.83269	0.0683934			5.85445	0.0734296	5.86661	0.0732586	5.72696	0.0731506	5.57275	0.0721629	6.02062	0.0721584	6.12118	0.0715729	5.84492	0.0708793	5.85255	0.0717585	5.82405	0.0717565	6.13457	0.0716925	5.73156	0.071007	6.08022	0.0705745	5.80799	0.0703944	5.66837	0.0748128	6.32632	0.0743684	5.52341	0.0696523	5.61198	0.0707808	5.99462	0.0707756	6.18598	0.0915162
				7.12288	0.0672939			5.88431	0.0734076	5.89025	0.0732401	5.75468	0.0731308	5.6089	0.0721311	6.04137	0.0721384	6.15856	0.0715429	5.86537	0.0708398	5.87258	0.0717372	5.84756	0.0717354	6.15739	0.0716731	5.76058	0.0709821	6.10679	0.0705525	5.83161	0.0703695	5.6963	0.0747806	6.36545	0.0743382	5.55205	0.0696037	5.63356	0.0707553	6.02885	0.0707077	6.48363	0.0914288
				7.43709	0.0662177			5.91417	0.0734296	5.9139	0.0732586	5.78239	0.0731506	5.64505	0.0721629	6.06212	0.0721584	6.19594	0.0715729	5.88582	0.0708793	5.8926	0.0717585	5.87107	0.0717565	6.18021	0.0716925	5.78959	0.071007	6.13336	0.0705745	5.85523	0.0703944	5.72424	0.0748128	6.40458	0.0743684	5.58069	0.0696523	5.65514	0.0707808	6.06308	0.0707756	6.78128	0.0915162
				7.77844	0.0651644			5.94288	0.0734949	5.93663	0.0733137	5.80905	0.0732094	5.6798	0.0722571	6.08208	0.0722177	6.23189	0.0716617	5.90548	0.0709963	5.91185	0.0718216	5.89367	0.0718189	6.20215	0.0717499	5.8175	0.0710806	6.1589	0.0706394	5.87794	0.0704682	5.75111	0.0749083	6.44221	0.0744582	5.60823	0.0697965	5.67589	0.0708564	6.09599	0.0709767	7.06749	0.0917752
				8.15059	0.0641333			5.96934	0.073601	5.95758	0.0734032	5.83361	0.0733048	5.71184	0.0724099	6.10047	0.072314	6.26502	0.0718059	5.9236	0.0711863	5.9296	0.071924	5.9145	0.0719203	6.22237	0.0718432	5.84321	0.0712002	6.18245	0.0707448	5.89887	0.070588	5.77586	0.0750634	6.47689	0.0746039	5.63361	0.0700307	5.69501	0.0709791	6.12632	0.0713034	7.33127	0.0921957
				8.5579	0.0631241			5.99253	0.0737437	5.97594	0.0735235	5.85514	0.0734332	5.73992	0.0726157	6.11659	0.0724435	6.29406	0.0719999	5.93949	0.071442	5.94515	0.0720618	5.93276	0.0720567	6.2401	0.0719687	5.86575	0.0713611	6.20309	0.0708867	5.91722	0.0707492	5.79757	0.075272	6.50728	0.0747999	5.65586	0.0703457	5.71177	0.0711442	6.15291	0.071743	7.56247	0.0927617
				9.0056	0.0621361			6.01157	0.0739176	5.99101	0.0736702	5.87281	0.0735896	5.76296	0.0728664	6.12982	0.0726013	6.31789	0.0722364	5.95252	0.0717535	5.95792	0.0722298	5.94775	0.072223	6.25464	0.0721217	5.88424	0.0715571	6.22002	0.0710596	5.93228	0.0709456	5.81537	0.0755263	6.53222	0.0750389	5.67412	0.0707297	5.72553	0.0713454	6.17473	0.0722787	7.75221	0.0934513
				9.5	0.0611689			6.02571	0.074116	6.00221	0.0738375	5.88594	0.0737681	5.78008	0.0731524	6.13965	0.0727814	6.33559	0.0725061	5.96221	0.0721089	5.9674	0.0724214	5.95888	0.0724126	6.26545	0.0722962	5.89799	0.0717808	6.23261	0.0712569	5.94347	0.0711698	5.82861	0.0758164	6.55076	0.0753114	5.68768	0.0711677	5.73575	0.0715749	6.19094	0.0728898	7.8932	0.0942381
				9.5	0.0611689			6.03442	0.0743312	6.00911	0.074019	5.89402	0.0739618	5.79063	0.0734628	6.1457	0.0729768	6.3465	0.0727988	5.96818	0.0724946	5.97324	0.0726293	5.96574	0.0726184	6.27211	0.0724855	5.90645	0.0720235	6.24036	0.0714709	5.95036	0.071413	5.83676	0.0761312	6.56217	0.0756072	5.69604	0.071643	5.74204	0.071824	6.20093	0.0735529	7.98003	0.0950918
				IsoLine	IsoLine			6.03736	0.0745551	6.01144	0.0742078	5.89675	0.0741632	5.79419	0.0737856	6.14775	0.07318	6.35018	0.0731032	5.97019	0.0728957	5.97522	0.0728455	5.96805	0.0728325	6.27435	0.0726824	5.90931	0.0722759	6.24298	0.0716935	5.95268	0.0716659	5.83951	0.0764585	6.56603	0.0759148	5.69886	0.0721373	5.74417	0.0720831	6.2043	0.0742425	8.00934	0.0959796
								ErrEll	ErrEll	ErrEll	ErrEll	ErrEll	ErrEll	ErrEll	ErrEll	ErrEll	ErrEll	ErrEll	ErrEll	ErrEll	ErrEll	ErrEll	ErrEll	ErrEll	ErrEll	ErrEll	ErrEll	ErrEll	ErrEll	ErrEll	ErrEll	ErrEll	ErrEll	ErrEll	ErrEll	ErrEll	ErrEll	ErrEll	ErrEll	ErrEll	ErrEll	ErrEll	ErrEll	ErrEll	ErrEll

## Sheet: PlotDat4
Source sheet	table_template	6.28386	0.0687556	3.10576	0.11	8.71821	0.0627568	6.40129	0.0687556	6.83436	0.0706816	6.44497	0.0730504	6.77681	0.0684659	6.43642	0.0696679	6.61166	0.0696604	6.6903	0.0699391	6.81741	0.0683914	5.58873	0.0739662	6.15036	0.0720687	6.10965	0.0765044	6.78952	0.0652453	6.89055	0.0667606	6.56396	0.0752983	6.29668	0.0675035	4.0678	0.0836656
Plot name	Concordia4	6.70868	0.0706816	3.10576	0.11	7.56836	0.0657994	6.39904	0.0690159	6.83195	0.0710172	6.4427	0.0735223	6.77369	0.0686185	6.43318	0.0698203	6.60817	0.0698299	6.68435	0.0702729	6.81142	0.0686191	5.58581	0.0745083	6.14546	0.0725186	6.10386	0.0771642	6.77816	0.065778	6.88432	0.0670639	6.55825	0.0759308	6.29447	0.0678842	4.06615	0.0863069
Plot Type	1	6.32686	0.0730504	3.17816	0.107858	6.67431	0.0690422	6.39236	0.0692663	6.8248	0.0713399	6.43597	0.0739762	6.76443	0.0687652	6.42359	0.0699668	6.59782	0.0699929	6.66673	0.0705939	6.79366	0.068838	5.57716	0.0750296	6.13094	0.0729511	6.08672	0.0777987	6.74452	0.0662902	6.86587	0.0673556	6.54135	0.076539	6.28794	0.0682502	4.06125	0.0888468
1st free col	41	6.6141	0.0684659	3.25358	0.105766	5.95934	0.0724996	6.3815	0.0694969	6.81318	0.0716373	6.42506	0.0743944	6.74939	0.0689005	6.408	0.0701019	6.58102	0.0701432	6.63812	0.0708897	6.76483	0.0690398	5.5631	0.07551	6.10736	0.0733498	6.05889	0.0783835	6.68989	0.0667623	6.83591	0.0676243	6.51391	0.0770995	6.27733	0.0685875	4.0533	0.0911875
Sigma Level	1	6.26781	0.0696679	3.33222	0.103724	5.37459	0.0761874	6.3669	0.0696991	6.79755	0.0718979	6.41037	0.074761	6.72916	0.069019	6.38704	0.0702202	6.5584	0.0702748	6.59962	0.071149	6.72602	0.0692166	5.54419	0.0759311	6.07563	0.0736992	6.02142	0.078896	6.61638	0.0671761	6.79559	0.0678599	6.47697	0.0775907	6.26304	0.0688832	4.0426	0.0932392
Absolute Errs	TRUE	6.42981	0.0696604	3.41429	0.101731	4.88752	0.0801223	6.3491	0.0698651	6.77851	0.0721118	6.39247	0.0750619	6.7045	0.0691163	6.36148	0.0703173	6.53084	0.0703829	6.55271	0.0713618	6.67874	0.0693618	5.52114	0.0762766	6.03697	0.073986	5.97578	0.0793166	6.5268	0.0675157	6.74646	0.0680533	6.43196	0.0779939	6.24564	0.0691258	4.02956	0.094923
Symbol Type	1	6.3807	0.0699391	3.50001	0.0997846	4.47557	0.0843223	6.3288	0.0699884	6.75678	0.0722708	6.37205	0.0752854	6.67637	0.0691885	6.33233	0.0703895	6.4994	0.0704632	6.49918	0.0715199	6.6248	0.0694696	5.49485	0.0765334	5.99286	0.0741991	5.9237	0.0796292	6.4246	0.067768	6.69041	0.0681969	6.38061	0.0782935	6.22578	0.0693062	4.01468	0.0961741
Inverse Plot	TRUE	6.50539	0.0683914	3.58964	0.0978844	4.12267	0.088807	6.30677	0.0700643	6.7332	0.0723687	6.3499	0.0754231	6.64585	0.069233	6.3007	0.070434	6.46529	0.0705127	6.4411	0.0716173	6.56626	0.069536	5.46631	0.0766915	5.945	0.0743303	5.86719	0.0798217	6.31371	0.0679234	6.62959	0.0682854	6.32489	0.078478	6.20423	0.0694172	3.99854	0.0969446
Color Plot	TRUE	5.43664	0.0739662	3.68344	0.0960289	3.81698	0.0935972	6.28386	0.07009	6.70868	0.0724017	6.32686	0.0754696	6.6141	0.0692481	6.26781	0.070449	6.42981	0.0705294	6.3807	0.0716502	6.50539	0.0695584	5.43664	0.0767449	5.89522	0.0743746	5.80842	0.0798866	6.19839	0.0679759	6.56634	0.0683153	6.26694	0.0785403	6.18183	0.0694547	3.98176	0.0972047
3D plot	FALSE	5.89522	0.0720687	3.78171	0.0942172	3.54967	0.0987156	6.26095	0.0700643	6.68416	0.0723687	6.30381	0.0754231	6.58236	0.069233	6.23491	0.070434	6.39433	0.0705127	6.3203	0.0716173	6.44452	0.069536	5.40697	0.0766915	5.84545	0.0743303	5.74965	0.0798217	6.08306	0.0679234	6.50309	0.0682854	6.209	0.078478	6.15942	0.0694172	3.96497	0.0969446
Linear	FALSE	5.80842	0.0765044	3.88477	0.092448	3.31396	0.104187	6.23892	0.0699884	6.66058	0.0722708	6.28166	0.0752854	6.55184	0.0691885	6.20328	0.0703895	6.36021	0.0704632	6.26223	0.0715199	6.38598	0.0694696	5.37844	0.0765334	5.79759	0.0741991	5.69314	0.0796292	5.97217	0.067768	6.44227	0.0681969	6.15328	0.0782935	6.13787	0.0693062	3.94883	0.0961741
Data Range	G77:J93	6.19839	0.0652453	3.99299	0.0907204	IsoLine	IsoLine	6.21861	0.0698651	6.63885	0.0721118	6.26124	0.0750619	6.52371	0.0691163	6.17413	0.0703173	6.32877	0.0703829	6.2087	0.0713618	6.33204	0.0693618	5.35214	0.0762766	5.75348	0.073986	5.64106	0.0793166	5.86997	0.0675157	6.38622	0.0680533	6.10193	0.0779939	6.11802	0.0691258	3.93395	0.094923
Filled Symbols	TRUE	6.56634	0.0667606	4.10676	0.0890331			6.20082	0.0696991	6.61981	0.0718979	6.24334	0.074761	6.49905	0.069019	6.14858	0.0702202	6.30121	0.0702748	6.16179	0.071149	6.28476	0.0692166	5.3291	0.0759311	5.71482	0.0736992	5.59541	0.078896	5.78039	0.0671761	6.33709	0.0678599	6.05692	0.0775907	6.10061	0.0688832	3.92091	0.0932392
ConcAge	FALSE	6.26694	0.0752983	4.22651	0.0873854			6.18621	0.0694969	6.60418	0.0716373	6.22865	0.0743944	6.47882	0.0689005	6.12761	0.0701019	6.2786	0.0701432	6.12328	0.0708897	6.24595	0.0690398	5.31018	0.07551	5.68309	0.0733498	5.55795	0.0783835	5.70688	0.0667623	6.29677	0.0676243	6.01998	0.0770995	6.08633	0.0685875	3.91021	0.0911875
ConcSwap	FALSE	6.18183	0.0675035	4.35273	0.085776			6.17536	0.0692663	6.59256	0.0713399	6.21774	0.0739762	6.46378	0.0687652	6.11203	0.0699668	6.26179	0.0699929	6.09468	0.0705939	6.21712	0.068838	5.29613	0.0750296	5.65951	0.0729511	5.53011	0.0777987	5.65225	0.0662902	6.26681	0.0673556	5.99254	0.076539	6.07572	0.0682502	3.90226	0.0888468
1st Symbol-row	1	3.98176	0.0836656	4.48596	0.0842041			6.16868	0.0690159	6.58541	0.0710172	6.21102	0.0735223	6.45452	0.0686185	6.10244	0.0698203	6.25144	0.0698299	6.07706	0.0702729	6.19936	0.0686191	5.28747	0.0745083	5.64499	0.0725186	5.51297	0.0771642	5.61861	0.065778	6.24836	0.0670639	5.97563	0.0759308	6.06918	0.0678842	3.89737	0.0863069
		IsoLine	IsoLine	4.62679	0.0826688			6.16642	0.0687556	6.58299	0.0706816	6.20875	0.0730504	6.4514	0.0684659	6.0992	0.0696679	6.24795	0.0696604	6.07111	0.0699391	6.19337	0.0683914	5.28455	0.0739662	5.64009	0.0720687	5.50718	0.0765044	5.60726	0.0652453	6.24213	0.0667606	5.96993	0.0752983	6.06697	0.0675035	3.89571	0.0836656
				4.77589	0.0811691			6.16868	0.0684953	6.58541	0.0703461	6.21102	0.0725784	6.45452	0.0683133	6.10244	0.0695156	6.25144	0.0694908	6.07706	0.0696052	6.19936	0.0681637	5.28747	0.0734242	5.64499	0.0716189	5.51297	0.0758445	5.61861	0.0647126	6.24836	0.0664573	5.97563	0.0746658	6.06918	0.0671229	3.89737	0.0810242
				4.93401	0.0797041			6.17536	0.068245	6.59256	0.0700234	6.21774	0.0721246	6.46378	0.0681666	6.11203	0.0693691	6.26179	0.0693278	6.09468	0.0692842	6.21712	0.0679448	5.29613	0.0729029	5.65951	0.0711863	5.53011	0.07521	5.65225	0.0642003	6.26681	0.0661657	5.99254	0.0740577	6.07572	0.0667568	3.90226	0.0784844
				5.10198	0.0782729			6.18621	0.0680143	6.60418	0.069726	6.22865	0.0717063	6.47882	0.0680314	6.12761	0.069234	6.2786	0.0691776	6.12328	0.0689884	6.24595	0.067743	5.31018	0.0724225	5.68309	0.0707877	5.55795	0.0746253	5.70688	0.0637282	6.29677	0.0658969	6.01998	0.0734972	6.08633	0.0664195	3.91021	0.0761437
				5.28077	0.0768747			6.20082	0.0678121	6.61981	0.0694653	6.24334	0.0713397	6.49905	0.0679129	6.14858	0.0691157	6.30121	0.0690459	6.16179	0.0687291	6.28476	0.0675662	5.3291	0.0720014	5.71482	0.0704383	5.59541	0.0741127	5.78039	0.0633145	6.33709	0.0656613	6.05692	0.0730059	6.10061	0.0661238	3.92091	0.074092
				5.47143	0.0755087			6.21861	0.0676462	6.63885	0.0692514	6.26124	0.0710388	6.52371	0.0678156	6.17413	0.0690185	6.32877	0.0689378	6.2087	0.0685163	6.33204	0.0674211	5.35214	0.0716559	5.75348	0.0701515	5.64106	0.0736921	5.86997	0.0629749	6.38622	0.065468	6.10193	0.0726027	6.11802	0.0658812	3.93395	0.0724082
				5.67521	0.0741741			6.23892	0.0675229	6.66058	0.0690925	6.28166	0.0708153	6.55184	0.0677433	6.20328	0.0689464	6.36021	0.0688575	6.26223	0.0683582	6.38598	0.0673132	5.37844	0.0713991	5.79759	0.0699384	5.69314	0.0733795	5.97217	0.0627225	6.44227	0.0653243	6.15328	0.0723031	6.13787	0.0657009	3.94883	0.0711571
				5.89348	0.0728701			6.26095	0.067447	6.68416	0.0689946	6.30381	0.0706776	6.58236	0.0676988	6.23491	0.0689019	6.39433	0.068808	6.3203	0.0682608	6.44452	0.0672468	5.40697	0.071241	5.84545	0.0698072	5.74965	0.073187	6.08306	0.0625672	6.50309	0.0652359	6.209	0.0721186	6.15942	0.0655898	3.96497	0.0703866
				6.12785	0.0715959			6.28386	0.0674213	6.70868	0.0689615	6.32686	0.0706311	6.6141	0.0676838	6.26781	0.0688869	6.42981	0.0687913	6.3807	0.0682279	6.50539	0.0672244	5.43664	0.0711876	5.89522	0.0697629	5.80842	0.0731221	6.19839	0.0625147	6.56634	0.065206	6.26694	0.0720563	6.18183	0.0655523	3.98176	0.0701265
				6.38017	0.0703508			6.30677	0.067447	6.7332	0.0689946	6.3499	0.0706776	6.64585	0.0676988	6.3007	0.0689019	6.46529	0.068808	6.4411	0.0682608	6.56626	0.0672468	5.46631	0.071241	5.945	0.0698072	5.86719	0.073187	6.31371	0.0625672	6.62959	0.0652359	6.32489	0.0721186	6.20423	0.0655898	3.99854	0.0703866
				6.65258	0.0691341			6.3288	0.0675229	6.75678	0.0690925	6.37205	0.0708153	6.67637	0.0677433	6.33233	0.0689464	6.4994	0.0688575	6.49918	0.0683582	6.6248	0.0673132	5.49485	0.0713991	5.99286	0.0699384	5.9237	0.0733795	6.4246	0.0627225	6.69041	0.0653243	6.38061	0.0723031	6.22578	0.0657009	4.01468	0.0711571
				6.94757	0.067945			6.3491	0.0676462	6.77851	0.0692514	6.39247	0.0710388	6.7045	0.0678156	6.36148	0.0690185	6.53084	0.0689378	6.55271	0.0685163	6.67874	0.0674211	5.52114	0.0716559	6.03697	0.0701515	5.97578	0.0736921	6.5268	0.0629749	6.74646	0.065468	6.43196	0.0726027	6.24564	0.0658812	4.02956	0.0724082
				7.26806	0.0667829			6.3669	0.0678121	6.79755	0.0694653	6.41037	0.0713397	6.72916	0.0679129	6.38704	0.0691157	6.5584	0.0690459	6.59962	0.0687291	6.72602	0.0675662	5.54419	0.0720014	6.07563	0.0704383	6.02142	0.0741127	6.61638	0.0633145	6.79559	0.0656613	6.47697	0.0730059	6.26304	0.0661238	4.0426	0.074092
				7.6175	0.0656471			6.3815	0.0680143	6.81318	0.069726	6.42506	0.0717063	6.74939	0.0680314	6.408	0.069234	6.58102	0.0691776	6.63812	0.0689884	6.76483	0.067743	5.5631	0.0724225	6.10736	0.0707877	6.05889	0.0746253	6.68989	0.0637282	6.83591	0.0658969	6.51391	0.0734972	6.27733	0.0664195	4.0533	0.0761437
				8	0.064537			6.39236	0.068245	6.8248	0.0700234	6.43597	0.0721246	6.76443	0.0681666	6.42359	0.0693691	6.59782	0.0693278	6.66673	0.0692842	6.79366	0.0679448	5.57716	0.0729029	6.13094	0.0711863	6.08672	0.07521	6.74452	0.0642003	6.86587	0.0661657	6.54135	0.0740577	6.28794	0.0667568	4.06125	0.0784844
				8	0.064537			6.39904	0.0684953	6.83195	0.0703461	6.4427	0.0725784	6.77369	0.0683133	6.43318	0.0695156	6.60817	0.0694908	6.68435	0.0696052	6.81142	0.0681637	5.58581	0.0734242	6.14546	0.0716189	6.10386	0.0758445	6.77816	0.0647126	6.88432	0.0664573	6.55825	0.0746658	6.29447	0.0671229	4.06615	0.0810242
				IsoLine	IsoLine			6.40129	0.0687556	6.83436	0.0706816	6.44497	0.0730504	6.77681	0.0684659	6.43642	0.0696679	6.61166	0.0696604	6.6903	0.0699391	6.81741	0.0683914	5.58873	0.0739662	6.15036	0.0720687	6.10965	0.0765044	6.78952	0.0652453	6.89055	0.0667606	6.56396	0.0752983	6.29668	0.0675035	4.0678	0.0836656
								ErrEll	ErrEll	ErrEll	ErrEll	ErrEll	ErrEll	ErrEll	ErrEll	ErrEll	ErrEll	ErrEll	ErrEll	ErrEll	ErrEll	ErrEll	ErrEll	ErrEll	ErrEll	ErrEll	ErrEll	ErrEll	ErrEll	ErrEll	ErrEll	ErrEll	ErrEll	ErrEll	ErrEll	ErrEll	ErrEll	ErrEll	ErrEll

## Sheet: PlotDat10
Source sheet	table_template	0.2	898.838	1	876.684	33.4376	0.85	843.246
Plot name	Average10	14.8	898.838	2	879.409	9.03778	1.15	843.246
Plot Type	15			3	895.709	9.23471	1.15	910.121
1st free col	8			4	898.289	43.8643	0.85	910.121
Sigma Level	1			5	902.398	9.6109	0.85	843.246
Absolute Errs	TRUE			6	914.013	44.6634	ErrBox	ErrBox
Symbol Type	1			7	919.814	20.3938	1.85	870.371
Inverse Plot	FALSE			8	929.457	45.8276	2.15	870.371
Color Plot	TRUE			9	933.736	35.8939	2.15	888.447
3D plot	FALSE			10	942.097	47.4917	1.85	888.447
Linear	FALSE			11	942.703	46.1687	1.85	870.371
Data Range	R78:S91			12	942.942	36.4593	ErrBox	ErrBox
Filled Symbols	TRUE			13	944.139	36.1764	2.85	886.474
ConcAge	FALSE			14	961.957	35.9424	3.15	886.474
ConcSwap	FALSE			IsoLine	IsoLine	IsoLine	3.15	904.944
1st Symbol-row	1						2.85	904.944
							2.85	886.474
							ErrBox	ErrBox
							3.85	854.424
							4.15	854.424
							4.15	942.153
							3.85	942.153
							3.85	854.424
							ErrBox	ErrBox
							4.85	892.787
							5.15	892.787
							5.15	912.009
							4.85	912.009
							4.85	892.787
							ErrBox	ErrBox
							5.85	869.35
							6.15	869.35
							6.15	958.676
							5.85	958.676
							5.85	869.35
							ErrBox	ErrBox
							6.85	899.42
							7.15	899.42
							7.15	940.208
							6.85	940.208
							6.85	899.42
							ErrBox	ErrBox
							7.85	883.63
							8.15	883.63
							8.15	975.285
							7.85	975.285
							7.85	883.63
							ErrBox	ErrBox
							8.85	897.842
							9.15	897.842
							9.15	969.63
							8.85	969.63
							8.85	897.842
							ErrBox	ErrBox
							9.85	894.605
							10.15	894.605
							10.15	989.589
							9.85	989.589
							9.85	894.605
							ErrBox	ErrBox
							10.85	896.534
							11.15	896.534
							11.15	988.871
							10.85	988.871
							10.85	896.534
							ErrBox	ErrBox
							11.85	906.483
							12.15	906.483
							12.15	979.401
							11.85	979.401
							11.85	906.483
							ErrBox	ErrBox
							12.85	907.962
							13.15	907.962
							13.15	980.315
							12.85	980.315
							12.85	907.962
							ErrBox	ErrBox
							13.85	926.015
							14.15	926.015
							14.15	997.9
							13.85	997.9
							13.85	926.015
							ErrBox	ErrBox

## Sheet: PlotDat13
Source sheet	table_template	3.52256	0.101429	3	0.113395	3.70587	0.0956039	3.61456	0.101429	3.4669	0.102689	3.42536	0.102762	3.43014	0.102912	3.42512	0.102979	3.57223	0.102997	3.60878	0.103046	3.50553	0.103121	3.57093	0.103148	3.39325	0.103247	3.43679	0.103359	3.57733	0.103477	3.43704	0.103538	3.49615	0.103557	3.4132	0.103602	3.50655	0.103971	3.49911	0.104339	3.38712	0.102137	3.66992	0.103995	3.71367	0.104014	3.72739	0.104162
Plot name	Concordia13	3.38904	0.102689	3	0.113395	3.65246	0.0966274	3.61279	0.101742	3.4654	0.102828	3.42402	0.102851	3.42873	0.102978	3.42374	0.103049	3.57033	0.10324	3.60666	0.1033	3.50411	0.103235	3.56912	0.103389	3.39192	0.103318	3.43544	0.103432	3.57542	0.103724	3.4357	0.10367	3.49471	0.103643	3.41191	0.103754	3.50527	0.104129	3.49735	0.104586	3.38577	0.102173	3.66803	0.104275	3.71077	0.104496	3.72534	0.104455
Plot Type	1	3.35523	0.102762	3.0198	0.112733	3.60041	0.0976645	3.60756	0.102043	3.46097	0.102961	3.42003	0.102937	3.42457	0.103041	3.41963	0.103116	3.56469	0.103474	3.60036	0.103543	3.49988	0.103345	3.56374	0.103621	3.38798	0.103386	3.43145	0.103502	3.56976	0.103961	3.43171	0.103797	3.49046	0.103726	3.40809	0.103901	3.50147	0.104281	3.49213	0.104824	3.38177	0.102207	3.66243	0.104544	3.70217	0.104959	3.71926	0.104737
1st free col	57	3.35703	0.102912	3.03984	0.112077	3.54967	0.0987156	3.59906	0.10232	3.45377	0.103084	3.41354	0.103016	3.41782	0.103099	3.41297	0.103178	3.55554	0.10369	3.59014	0.103767	3.49301	0.103446	3.555	0.103835	3.38158	0.103448	3.42497	0.103567	3.56057	0.104181	3.42524	0.103914	3.48354	0.103803	3.40188	0.104036	3.49532	0.104421	3.48366	0.105043	3.37528	0.102239	3.65335	0.104792	3.68821	0.105385	3.70938	0.104996
Sigma Level	1	3.35298	0.102979	3.06011	0.111425	3.50019	0.0997808	3.58762	0.102562	3.44409	0.103192	3.40482	0.103086	3.40873	0.10315	3.40399	0.103233	3.54322	0.103879	3.57638	0.103964	3.48377	0.103535	3.54324	0.104022	3.37296	0.103503	3.41625	0.103624	3.5482	0.104373	3.41653	0.104016	3.47424	0.10387	3.39354	0.104154	3.48703	0.104544	3.47226	0.105234	3.36654	0.102267	3.64112	0.105009	3.66943	0.105759	3.69609	0.105224
Absolute Errs	TRUE	3.47318	0.102997	3.08061	0.110778	3.45192	0.10086	3.57367	0.102762	3.4323	0.103281	3.39419	0.103143	3.39765	0.103192	3.39306	0.103277	3.52821	0.104034	3.55962	0.104125	3.4725	0.103608	3.52892	0.104176	3.36246	0.103548	3.40562	0.10367	3.53313	0.10453	3.40591	0.1041	3.4629	0.103925	3.38336	0.104251	3.47693	0.104644	3.45836	0.105392	3.3559	0.10229	3.62621	0.105187	3.64655	0.106066	3.6799	0.10541
Symbol Type	1	3.49816	0.103046	3.10136	0.110135	3.40482	0.101954	3.55777	0.10291	3.41884	0.103347	3.38207	0.103185	3.38501	0.103223	3.38059	0.10331	3.51109	0.104149	3.5405	0.104245	3.45965	0.103662	3.51257	0.10429	3.35049	0.103582	3.3935	0.103705	3.51593	0.104647	3.3938	0.104163	3.44997	0.103966	3.37176	0.104323	3.46541	0.104719	3.44251	0.105509	3.34375	0.102307	3.60921	0.10532	3.62044	0.106294	3.66142	0.105549
Inverse Plot	TRUE	3.43121	0.103121	3.12235	0.109497	3.35884	0.103063	3.54051	0.103001	3.40423	0.103387	3.36891	0.103211	3.37129	0.103242	3.36705	0.103331	3.4925	0.10422	3.51974	0.104319	3.44571	0.103696	3.49484	0.10436	3.33749	0.103603	3.38034	0.103726	3.49727	0.104719	3.38066	0.104201	3.43593	0.103991	3.35916	0.104367	3.45291	0.104765	3.42532	0.105581	3.33057	0.102318	3.59077	0.105401	3.59211	0.106434	3.64138	0.105635
Color Plot	TRUE	3.47639	0.103148	3.1436	0.108863	3.31396	0.104187	3.52256	0.103032	3.38904	0.103401	3.35523	0.10322	3.35703	0.103248	3.35298	0.103338	3.47318	0.104244	3.49816	0.104344	3.43121	0.103707	3.47639	0.104384	3.32397	0.10361	3.36666	0.103733	3.47786	0.104744	3.367	0.104214	3.42134	0.104	3.34607	0.104382	3.4399	0.104781	3.40743	0.105605	3.31687	0.102321	3.57158	0.105429	3.56264	0.106482	3.62053	0.105663
3D plot	FALSE	3.32397	0.103247	3.1651	0.108234	3.27012	0.105325	3.50461	0.103001	3.37385	0.103387	3.34154	0.103211	3.34277	0.103242	3.3389	0.103331	3.45386	0.10422	3.47658	0.104319	3.41671	0.103696	3.45795	0.10436	3.31046	0.103603	3.35298	0.103726	3.45846	0.104719	3.35333	0.104201	3.40674	0.103991	3.33297	0.104367	3.4269	0.104765	3.38954	0.105581	3.30316	0.102318	3.5524	0.105401	3.53318	0.106434	3.59968	0.105635
Linear	FALSE	3.36666	0.103359	3.18686	0.107609	3.2273	0.106479	3.48735	0.10291	3.35925	0.103347	3.32839	0.103185	3.32906	0.103223	3.32536	0.10331	3.43527	0.104149	3.45583	0.104245	3.40277	0.103662	3.44021	0.10429	3.29746	0.103582	3.33983	0.103705	3.4398	0.104647	3.34019	0.104163	3.39271	0.103966	3.32037	0.104323	3.4144	0.104719	3.37234	0.105509	3.28998	0.102307	3.53395	0.10532	3.50485	0.106294	3.57964	0.105549
Data Range	G24:J42,G45:J50	3.47786	0.103477	3.20889	0.106989	3.18546	0.107649	3.47144	0.102762	3.34579	0.103281	3.31626	0.103143	3.31642	0.103192	3.31289	0.103277	3.41815	0.104034	3.43671	0.104125	3.38992	0.103608	3.42387	0.104176	3.28549	0.103548	3.3277	0.10367	3.4226	0.10453	3.32808	0.1041	3.37978	0.103925	3.30877	0.104251	3.40288	0.104644	3.35649	0.105392	3.27784	0.10229	3.51695	0.105187	3.47874	0.106066	3.56116	0.10541
Filled Symbols	TRUE	3.367	0.103538	3.23119	0.106373	3.14456	0.108835	3.4575	0.102562	3.33399	0.103192	3.30563	0.103086	3.30534	0.10315	3.30196	0.103233	3.40314	0.103879	3.41995	0.103964	3.37866	0.103535	3.40954	0.104022	3.27499	0.103503	3.31707	0.103624	3.40753	0.104373	3.31747	0.104016	3.36844	0.10387	3.2986	0.104154	3.39278	0.104544	3.3426	0.105234	3.26719	0.102267	3.50205	0.105009	3.45585	0.105759	3.54497	0.105224
ConcAge	FALSE	3.42134	0.103557	3.25376	0.105761	3.10458	0.110036	3.44606	0.10232	3.32431	0.103084	3.29691	0.103016	3.29625	0.103099	3.29299	0.103178	3.39082	0.10369	3.40619	0.103767	3.36942	0.103446	3.39779	0.103835	3.26637	0.103448	3.30835	0.103567	3.39516	0.104181	3.30876	0.103914	3.35914	0.103803	3.29025	0.104036	3.38449	0.104421	3.3312	0.105043	3.25846	0.102239	3.48982	0.104792	3.43707	0.105385	3.53168	0.104996
ConcSwap	FALSE	3.34607	0.103602	3.27661	0.105154	3.06548	0.111254	3.43756	0.102043	3.31712	0.102961	3.29043	0.102937	3.28949	0.103041	3.28632	0.103116	3.38167	0.103474	3.39597	0.103543	3.36255	0.103345	3.38905	0.103621	3.25997	0.103386	3.30187	0.103502	3.38597	0.103961	3.30228	0.103797	3.35222	0.103726	3.28404	0.103901	3.37833	0.104281	3.32273	0.104824	3.25196	0.102207	3.48073	0.104544	3.42311	0.104959	3.52181	0.104737
1st Symbol-row	1	3.4399	0.103971	3.29974	0.104551	3.02724	0.112488	3.43232	0.101742	3.31269	0.102828	3.28644	0.102851	3.28533	0.102978	3.28221	0.103049	3.37603	0.10324	3.38967	0.1033	3.35832	0.103235	3.38367	0.103389	3.25603	0.103318	3.29788	0.103432	3.38031	0.103724	3.2983	0.10367	3.34797	0.103643	3.28022	0.103754	3.37454	0.104129	3.31751	0.104586	3.24797	0.102173	3.47513	0.104275	3.41452	0.104496	3.51573	0.104455
		3.40743	0.104339	3.32317	0.103952	IsoLine	IsoLine	3.43056	0.101429	3.31119	0.102689	3.28509	0.102762	3.28393	0.102912	3.28083	0.102979	3.37413	0.102997	3.38755	0.103046	3.35689	0.103121	3.38185	0.103148	3.2547	0.103247	3.29653	0.103359	3.37839	0.103477	3.29695	0.103538	3.34653	0.103557	3.27893	0.103602	3.37326	0.103971	3.31575	0.104339	3.24662	0.102137	3.47325	0.103995	3.41162	0.104014	3.51367	0.104162
		3.31687	0.102137	3.34689	0.103358			3.43232	0.101117	3.31269	0.10255	3.28644	0.102672	3.28533	0.102847	3.28221	0.102909	3.37603	0.102754	3.38967	0.102793	3.35832	0.103007	3.38367	0.102906	3.25603	0.103177	3.29788	0.103286	3.38031	0.103229	3.2983	0.103406	3.34797	0.103471	3.28022	0.10345	3.37454	0.103813	3.31751	0.104092	3.24797	0.102101	3.47513	0.103715	3.41452	0.103533	3.51573	0.103869
		3.57158	0.103995	3.37092	0.102768			3.43756	0.100816	3.31712	0.102416	3.29043	0.102586	3.28949	0.102784	3.28632	0.102841	3.38167	0.10252	3.39597	0.10255	3.36255	0.102897	3.38905	0.102674	3.25997	0.103109	3.30187	0.103216	3.38597	0.102992	3.30228	0.10328	3.35222	0.103388	3.28404	0.103304	3.37833	0.103661	3.32273	0.103855	3.25196	0.102066	3.48073	0.103446	3.42311	0.10307	3.52181	0.103587
		3.56264	0.104014	3.39525	0.102182			3.44606	0.100539	3.32431	0.102293	3.29691	0.102507	3.29625	0.102726	3.29299	0.102779	3.39082	0.102304	3.40619	0.102326	3.36942	0.102796	3.39779	0.102461	3.26637	0.103046	3.30835	0.103152	3.39516	0.102773	3.30876	0.103163	3.35914	0.103311	3.29025	0.103169	3.38449	0.103521	3.3312	0.103636	3.25846	0.102034	3.48982	0.103198	3.43707	0.102644	3.53168	0.103328
		3.62053	0.104162	3.41989	0.1016			3.4575	0.100296	3.33399	0.102185	3.30563	0.102437	3.30534	0.102675	3.30196	0.102725	3.40314	0.102115	3.41995	0.102129	3.37866	0.102707	3.40954	0.102273	3.27499	0.102991	3.31707	0.103095	3.40753	0.102581	3.31747	0.10306	3.36844	0.103244	3.2986	0.103051	3.39278	0.103399	3.3426	0.103444	3.26719	0.102006	3.50205	0.102981	3.45585	0.10227	3.54497	0.1031
		3.53365	0.104616	3.44485	0.101022			3.47144	0.100097	3.34579	0.102096	3.31626	0.10238	3.31642	0.102633	3.31289	0.10268	3.41815	0.10196	3.43671	0.101968	3.38992	0.102634	3.42387	0.102119	3.28549	0.102946	3.3277	0.103049	3.4226	0.102423	3.32808	0.102976	3.37978	0.103189	3.30877	0.102954	3.40288	0.103298	3.35649	0.103287	3.27784	0.101983	3.51695	0.102802	3.47874	0.101963	3.56116	0.102914
		3.50918	0.104663	3.47014	0.100448			3.48735	0.099949	3.35925	0.102031	3.32839	0.102338	3.32906	0.102602	3.32536	0.102647	3.43527	0.101845	3.45583	0.101848	3.40277	0.10258	3.44021	0.102005	3.29746	0.102912	3.33983	0.103014	3.4398	0.102306	3.34019	0.102914	3.39271	0.103148	3.32037	0.102882	3.4144	0.103223	3.37234	0.10317	3.28998	0.101966	3.53395	0.10267	3.50485	0.101735	3.57964	0.102775
		3.76284	0.106436	3.49576	0.0998781			3.50461	0.0998579	3.37385	0.10199	3.34154	0.102312	3.34277	0.102583	3.3389	0.102627	3.45386	0.101774	3.47658	0.101774	3.41671	0.102547	3.45795	0.101935	3.31046	0.102892	3.35298	0.102993	3.45846	0.102234	3.35333	0.102875	3.40674	0.103123	3.33297	0.102838	3.4269	0.103177	3.38954	0.103098	3.30316	0.101956	3.5524	0.102588	3.53318	0.101595	3.59968	0.102689
		IsoLine	IsoLine	3.52172	0.0993123			3.52256	0.0998271	3.38904	0.101976	3.35523	0.102303	3.35703	0.102577	3.35298	0.10262	3.47318	0.10175	3.49816	0.101749	3.43121	0.102535	3.47639	0.101911	3.32397	0.102885	3.36666	0.102986	3.47786	0.102209	3.367	0.102862	3.42134	0.103115	3.34607	0.102823	3.4399	0.103161	3.40743	0.103074	3.31687	0.101952	3.57158	0.102561	3.56264	0.101547	3.62053	0.102661
				3.54802	0.0987505			3.54051	0.0998579	3.40423	0.10199	3.36891	0.102312	3.37129	0.102583	3.36705	0.102627	3.4925	0.101774	3.51974	0.101774	3.44571	0.102547	3.49484	0.101935	3.33749	0.102892	3.38034	0.102993	3.49727	0.102234	3.38066	0.102875	3.43593	0.103123	3.35916	0.102838	3.45291	0.103177	3.42532	0.103098	3.33057	0.101956	3.59077	0.102588	3.59211	0.101595	3.64138	0.102689
				3.57467	0.0981926			3.55777	0.099949	3.41884	0.102031	3.38207	0.102338	3.38501	0.102602	3.38059	0.102647	3.51109	0.101845	3.5405	0.101848	3.45965	0.10258	3.51257	0.102005	3.35049	0.102912	3.3935	0.103014	3.51593	0.102306	3.3938	0.102914	3.44997	0.103148	3.37176	0.102882	3.46541	0.103223	3.44251	0.10317	3.34375	0.101966	3.60921	0.10267	3.62044	0.101735	3.66142	0.102775
				3.60169	0.0976387			3.57367	0.100097	3.4323	0.102096	3.39419	0.10238	3.39765	0.102633	3.39306	0.10268	3.52821	0.10196	3.55962	0.101968	3.4725	0.102634	3.52892	0.102119	3.36246	0.102946	3.40562	0.103049	3.53313	0.102423	3.40591	0.102976	3.4629	0.103189	3.38336	0.102954	3.47693	0.103298	3.45836	0.103287	3.3559	0.101983	3.62621	0.102802	3.64655	0.101963	3.6799	0.102914
				3.62907	0.0970886			3.58762	0.100296	3.44409	0.102185	3.40482	0.102437	3.40873	0.102675	3.40399	0.102725	3.54322	0.102115	3.57638	0.102129	3.48377	0.102707	3.54324	0.102273	3.37296	0.102991	3.41625	0.103095	3.5482	0.102581	3.41653	0.10306	3.47424	0.103244	3.39354	0.103051	3.48703	0.103399	3.47226	0.103444	3.36654	0.102006	3.64112	0.102981	3.66943	0.10227	3.69609	0.1031
				3.65682	0.0965424			3.59906	0.100539	3.45377	0.102293	3.41354	0.102507	3.41782	0.102726	3.41297	0.102779	3.55554	0.102304	3.59014	0.102326	3.49301	0.102796	3.555	0.102461	3.38158	0.103046	3.42497	0.103152	3.56057	0.102773	3.42524	0.103163	3.48354	0.103311	3.40188	0.103169	3.49532	0.103521	3.48366	0.103636	3.37528	0.102034	3.65335	0.103198	3.68821	0.102644	3.70938	0.103328
				3.68495	0.096			3.60756	0.100816	3.46097	0.102416	3.42003	0.102586	3.42457	0.102784	3.41963	0.102841	3.56469	0.10252	3.60036	0.10255	3.49988	0.102897	3.56374	0.102674	3.38798	0.103109	3.43145	0.103216	3.56976	0.102992	3.43171	0.10328	3.49046	0.103388	3.40809	0.103304	3.50147	0.103661	3.49213	0.103855	3.38177	0.102066	3.66243	0.103446	3.70217	0.10307	3.71926	0.103587
				3.68495	0.096			3.61279	0.101117	3.4654	0.10255	3.42402	0.102672	3.42873	0.102847	3.42374	0.102909	3.57033	0.102754	3.60666	0.102793	3.50411	0.103007	3.56912	0.102906	3.39192	0.103177	3.43544	0.103286	3.57542	0.103229	3.4357	0.103406	3.49471	0.103471	3.41191	0.10345	3.50527	0.103813	3.49735	0.104092	3.38577	0.102101	3.66803	0.103715	3.71077	0.103533	3.72534	0.103869
				IsoLine	IsoLine			3.61456	0.101429	3.4669	0.102689	3.42536	0.102762	3.43014	0.102912	3.42512	0.102979	3.57223	0.102997	3.60878	0.103046	3.50553	0.103121	3.57093	0.103148	3.39325	0.103247	3.43679	0.103359	3.57733	0.103477	3.43704	0.103538	3.49615	0.103557	3.4132	0.103602	3.50655	0.103971	3.49911	0.104339	3.38712	0.102137	3.66992	0.103995	3.71367	0.104014	3.72739	0.104162
								ErrEll	ErrEll	ErrEll	ErrEll	ErrEll	ErrEll	ErrEll	ErrEll	ErrEll	ErrEll	ErrEll	ErrEll	ErrEll	ErrEll	ErrEll	ErrEll	ErrEll	ErrEll	ErrEll	ErrEll	ErrEll	ErrEll	ErrEll	ErrEll	ErrEll	ErrEll	ErrEll	ErrEll	ErrEll	ErrEll	ErrEll	ErrEll	ErrEll	ErrEll	ErrEll	ErrEll	ErrEll	ErrEll	ErrEll	ErrEll	ErrEll	ErrEll
[truncated: 6 more columns]

## Sheet: PlotDat14
Source sheet	table_template	5.88431	0.0745551	5	0.0791273	7.00694	0.0677201	6.03736	0.0745551	6.01144	0.0742078	5.89675	0.0741632	5.79419	0.0737856	6.14775	0.07318	6.35018	0.0731032	5.97019	0.0728957	5.97522	0.0728455	5.96805	0.0728325	5.90931	0.0722759	6.24298	0.0716935	5.95268	0.0716659	6.27435	0.0726824	5.83951	0.0764585	6.56603	0.0759148	5.69886	0.0721373	5.74417	0.0720831	6.2043	0.0742425
Plot name	Concordia14	5.89025	0.0742078	5	0.0791273	6.83684	0.0683769	6.03442	0.074779	6.00911	0.0743966	5.89402	0.0743646	5.79063	0.0741083	6.1457	0.0733832	6.3465	0.0734076	5.96818	0.0732967	5.97324	0.0730618	5.96574	0.0730465	5.90645	0.0725283	6.24036	0.0719161	5.95036	0.0719188	6.27211	0.0728794	5.83676	0.0767859	6.56217	0.0762224	5.69604	0.0726316	5.74204	0.0723421	6.20093	0.0749321
Plot Type	1	5.75468	0.0741632	5.05094	0.078695	6.67431	0.0690422	6.02571	0.0749943	6.00221	0.0745782	5.88594	0.0745583	5.78008	0.0744187	6.13965	0.0735786	6.33559	0.0737003	5.96221	0.0736824	5.9674	0.0732697	5.95888	0.0732523	5.89799	0.072771	6.23261	0.0721301	5.94347	0.072162	6.26545	0.0730687	5.82861	0.0771006	6.55076	0.0765182	5.68768	0.0731069	5.73575	0.0725912	6.19094	0.0755953
1st free col	45	5.6089	0.0737856	5.10285	0.0782658	6.51886	0.069716	6.01157	0.0751926	5.99101	0.0747455	5.87281	0.0747368	5.76296	0.0747047	6.12982	0.0737587	6.31789	0.07397	5.95252	0.0740378	5.95792	0.0734613	5.94775	0.0734419	5.88424	0.0729947	6.22002	0.0723274	5.93228	0.0723861	6.25464	0.0732432	5.81537	0.0773907	6.53222	0.0767907	5.67412	0.0735449	5.72553	0.0728207	6.17473	0.0762064
Sigma Level	1	6.04137	0.07318	5.15574	0.0778396	6.37003	0.0703985	5.99253	0.0753665	5.97594	0.0748922	5.85514	0.0748932	5.73992	0.0749554	6.11659	0.0739165	6.29406	0.0742065	5.93949	0.0743494	5.94515	0.0736293	5.93276	0.0736082	5.86575	0.0731907	6.20309	0.0725003	5.91722	0.0725826	6.2401	0.0733961	5.79757	0.077645	6.50728	0.0770297	5.65586	0.0739288	5.71177	0.0730219	6.15291	0.076742
Absolute Errs	TRUE	6.15856	0.0731032	5.20965	0.0774165	6.22742	0.0710899	5.96934	0.0755092	5.95758	0.0750125	5.83361	0.0750216	5.71184	0.0751612	6.10047	0.074046	6.26502	0.0744005	5.9236	0.074605	5.9296	0.0737671	5.9145	0.0737446	5.84321	0.0733516	6.18245	0.0726422	5.89887	0.0727438	6.22237	0.0735217	5.77586	0.0778536	6.47689	0.0772257	5.63361	0.0742439	5.69501	0.073187	6.12632	0.0771816
Symbol Type	1	5.86537	0.0728957	5.2646	0.0769962	6.09064	0.0717902	5.94288	0.0756153	5.93663	0.0751019	5.80905	0.075117	5.6798	0.0753141	6.08208	0.0741423	6.23189	0.0745447	5.90548	0.074795	5.91185	0.0738695	5.89367	0.073846	5.8175	0.0734712	6.1589	0.0727476	5.87794	0.0728636	6.20215	0.0736149	5.75111	0.0780087	6.44221	0.0773714	5.60823	0.0744781	5.67589	0.0733097	6.09599	0.0775083
Inverse Plot	TRUE	5.87258	0.0728455	5.32063	0.076579	5.95934	0.0724996	5.91417	0.0756806	5.9139	0.075157	5.78239	0.0751758	5.64505	0.0754082	6.06212	0.0742016	6.19594	0.0746335	5.88582	0.074912	5.8926	0.0739326	5.87107	0.0739084	5.78959	0.0735448	6.13336	0.0728125	5.85523	0.0729374	6.18021	0.0736724	5.72424	0.0781042	6.40458	0.0774612	5.58069	0.0746222	5.65514	0.0733853	6.06308	0.0777095
Color Plot	TRUE	5.84756	0.0728325	5.37777	0.0761646	5.83319	0.0732183	5.88431	0.0757026	5.89025	0.0751756	5.75468	0.0751956	5.6089	0.07544	6.04137	0.0742216	6.15856	0.0746635	5.86537	0.0749515	5.87258	0.0739539	5.84756	0.0739295	5.76058	0.0735696	6.10679	0.0728344	5.83161	0.0729623	6.15739	0.0736918	5.6963	0.0781364	6.36545	0.0774915	5.55205	0.0746709	5.63356	0.0734108	6.02885	0.0777774
3D plot	FALSE	5.76058	0.0722759	5.43605	0.0757532	5.71191	0.0739462	5.85445	0.0756806	5.86661	0.075157	5.72696	0.0751758	5.57275	0.0754082	6.02062	0.0742016	6.12118	0.0746335	5.84492	0.074912	5.85255	0.0739326	5.82405	0.0739084	5.73156	0.0735448	6.08022	0.0728125	5.80799	0.0729374	6.13457	0.0736724	5.66837	0.0781042	6.32632	0.0774612	5.52341	0.0746222	5.61198	0.0733853	5.99462	0.0777095
Linear	FALSE	6.10679	0.0716935	5.49551	0.0753446	5.59522	0.0746836	5.82574	0.0756153	5.84388	0.0751019	5.70031	0.075117	5.53799	0.0753141	6.00066	0.0741423	6.08523	0.0745447	5.82525	0.074795	5.8333	0.0738695	5.80145	0.073846	5.70366	0.0734712	6.05467	0.0727476	5.78528	0.0728636	6.11263	0.0736149	5.6415	0.0780087	6.2887	0.0773714	5.49587	0.0744781	5.59123	0.0733097	5.96171	0.0775083
Data Range	G54:J73	5.83161	0.0716659	5.55618	0.0749389	5.48286	0.0754307	5.79928	0.0755092	5.82293	0.0750125	5.67574	0.0750216	5.50596	0.0751612	5.98227	0.074046	6.05211	0.0744005	5.80713	0.074605	5.81555	0.0737671	5.78062	0.0737446	5.67795	0.0733516	6.03112	0.0726422	5.76435	0.0727438	6.0924	0.0735217	5.61674	0.0778536	6.25402	0.0772257	5.47048	0.0742439	5.57211	0.073187	5.93137	0.0771816
Filled Symbols	TRUE	6.15739	0.0726824	5.61809	0.0745361	5.37459	0.0761874	5.77609	0.0753665	5.80457	0.0748922	5.65421	0.0748932	5.47788	0.0749554	5.96615	0.0739165	6.02307	0.0742065	5.79125	0.0743494	5.8	0.0736293	5.76236	0.0736082	5.65541	0.0731907	6.01049	0.0725003	5.746	0.0725826	6.07468	0.0733961	5.59504	0.077645	6.22362	0.0770297	5.44824	0.0739288	5.55535	0.0730219	5.90479	0.076742
ConcAge	FALSE	5.6963	0.0764585	5.6813	0.074136	5.2702	0.0769541	5.75706	0.0751926	5.7895	0.0747455	5.63655	0.0747368	5.45484	0.0747047	5.95292	0.0737587	5.99924	0.07397	5.77821	0.0740378	5.78723	0.0734613	5.74737	0.0734419	5.63692	0.0729947	5.99355	0.0723274	5.73094	0.0723861	6.06013	0.0732432	5.57723	0.0773907	6.19868	0.0767907	5.42998	0.0735449	5.54159	0.0728207	5.88297	0.0762064
ConcSwap	FALSE	6.36545	0.0759148	5.74583	0.0737388	5.16948	0.0777308	5.74291	0.0749943	5.7783	0.0745782	5.62342	0.0745583	5.43771	0.0744187	5.94309	0.0735786	5.98153	0.0737003	5.76852	0.0736824	5.77775	0.0732697	5.73624	0.0732523	5.62317	0.072771	5.98096	0.0721301	5.71976	0.072162	6.04932	0.0730687	5.564	0.0771006	6.18015	0.0765182	5.41641	0.0731069	5.53137	0.0725912	5.86675	0.0755953
1st Symbol-row	1	5.55205	0.0721373	5.81174	0.0733443	5.07224	0.0785176	5.7342	0.074779	5.7714	0.0743966	5.61533	0.0743646	5.42717	0.0741083	5.93704	0.0733832	5.97063	0.0734076	5.76256	0.0732967	5.77191	0.0730618	5.72938	0.0730465	5.61471	0.0725283	5.97321	0.0719161	5.71287	0.0719188	6.04267	0.0728794	5.55585	0.0767859	6.16873	0.0762224	5.40806	0.0726316	5.52508	0.0723421	5.85677	0.0749321
		5.63356	0.0720831	5.87905	0.0729526	IsoLine	IsoLine	5.73126	0.0745551	5.76907	0.0742078	5.6126	0.0741632	5.42361	0.0737856	5.93499	0.07318	5.96695	0.0731032	5.76055	0.0728957	5.76994	0.0728455	5.72706	0.0728325	5.61185	0.0722759	5.9706	0.0716935	5.71054	0.0716659	6.04042	0.0726824	5.5531	0.0764585	6.16488	0.0759148	5.40524	0.0721373	5.52295	0.0720831	5.8534	0.0742425
		6.02885	0.0742425	5.94783	0.0725636			5.7342	0.0743312	5.7714	0.074019	5.61533	0.0739618	5.42717	0.0734628	5.93704	0.0729768	5.97063	0.0727988	5.76256	0.0724946	5.77191	0.0726293	5.72938	0.0726184	5.61471	0.0720235	5.97321	0.0714709	5.71287	0.071413	6.04267	0.0724855	5.55585	0.0761312	6.16873	0.0756072	5.40806	0.071643	5.52508	0.071824	5.85677	0.0735529
		IsoLine	IsoLine	6.01812	0.0721773			5.74291	0.074116	5.7783	0.0738375	5.62342	0.0737681	5.43771	0.0731524	5.94309	0.0727814	5.98153	0.0725061	5.76852	0.0721089	5.77775	0.0724214	5.73624	0.0724126	5.62317	0.0717808	5.98096	0.0712569	5.71976	0.0711698	6.04932	0.0722962	5.564	0.0758164	6.18015	0.0753114	5.41641	0.0711677	5.53137	0.0715749	5.86675	0.0728898
				6.08997	0.0717938			5.75706	0.0739176	5.7895	0.0736702	5.63655	0.0735896	5.45484	0.0728664	5.95292	0.0726013	5.99924	0.0722364	5.77821	0.0717535	5.78723	0.0722298	5.74737	0.072223	5.63692	0.0715571	5.99355	0.0710596	5.73094	0.0709456	6.06013	0.0721217	5.57723	0.0755263	6.19868	0.0750389	5.42998	0.0707297	5.54159	0.0713454	5.88297	0.0722787
				6.16343	0.0714128			5.77609	0.0737437	5.80457	0.0735235	5.65421	0.0734332	5.47788	0.0726157	5.96615	0.0724435	6.02307	0.0719999	5.79125	0.071442	5.8	0.0720618	5.76236	0.0720567	5.65541	0.0713611	6.01049	0.0708867	5.746	0.0707492	6.07468	0.0719687	5.59504	0.075272	6.22362	0.0747999	5.44824	0.0703457	5.55535	0.0711442	5.90479	0.071743
				6.23855	0.0710346			5.79928	0.073601	5.82293	0.0734032	5.67574	0.0733048	5.50596	0.0724099	5.98227	0.072314	6.05211	0.0718059	5.80713	0.0711863	5.81555	0.071924	5.78062	0.0719203	5.67795	0.0712002	6.03112	0.0707448	5.76435	0.070588	6.0924	0.0718432	5.61674	0.0750634	6.25402	0.0746039	5.47048	0.0700307	5.57211	0.0709791	5.93137	0.0713034
				6.31539	0.0706589			5.82574	0.0734949	5.84388	0.0733137	5.70031	0.0732094	5.53799	0.0722571	6.00066	0.0722177	6.08523	0.0716617	5.82525	0.0709963	5.8333	0.0718216	5.80145	0.0718189	5.70366	0.0710806	6.05467	0.0706394	5.78528	0.0704682	6.11263	0.0717499	5.6415	0.0749083	6.2887	0.0744582	5.49587	0.0697965	5.59123	0.0708564	5.96171	0.0709767
				6.39402	0.0702859			5.85445	0.0734296	5.86661	0.0732586	5.72696	0.0731506	5.57275	0.0721629	6.02062	0.0721584	6.12118	0.0715729	5.84492	0.0708793	5.85255	0.0717585	5.82405	0.0717565	5.73156	0.071007	6.08022	0.0705745	5.80799	0.0703944	6.13457	0.0716925	5.66837	0.0748128	6.32632	0.0743684	5.52341	0.0696523	5.61198	0.0707808	5.99462	0.0707756
				6.4745	0.0699155			5.88431	0.0734076	5.89025	0.0732401	5.75468	0.0731308	5.6089	0.0721311	6.04137	0.0721384	6.15856	0.0715429	5.86537	0.0708398	5.87258	0.0717372	5.84756	0.0717354	5.76058	0.0709821	6.10679	0.0705525	5.83161	0.0703695	6.15739	0.0716731	5.6963	0.0747806	6.36545	0.0743382	5.55205	0.0696037	5.63356	0.0707553	6.02885	0.0707077
				6.55688	0.0695476			5.91417	0.0734296	5.9139	0.0732586	5.78239	0.0731506	5.64505	0.0721629	6.06212	0.0721584	6.19594	0.0715729	5.88582	0.0708793	5.8926	0.0717585	5.87107	0.0717565	5.78959	0.071007	6.13336	0.0705745	5.85523	0.0703944	6.18021	0.0716925	5.72424	0.0748128	6.40458	0.0743684	5.58069	0.0696523	5.65514	0.0707808	6.06308	0.0707756
				6.64125	0.0691823			5.94288	0.0734949	5.93663	0.0733137	5.80905	0.0732094	5.6798	0.0722571	6.08208	0.0722177	6.23189	0.0716617	5.90548	0.0709963	5.91185	0.0718216	5.89367	0.0718189	5.8175	0.0710806	6.1589	0.0706394	5.87794	0.0704682	6.20215	0.0717499	5.75111	0.0749083	6.44221	0.0744582	5.60823	0.0697965	5.67589	0.0708564	6.09599	0.0709767
				6.72766	0.0688195			5.96934	0.073601	5.95758	0.0734032	5.83361	0.0733048	5.71184	0.0724099	6.10047	0.072314	6.26502	0.0718059	5.9236	0.0711863	5.9296	0.071924	5.9145	0.0719203	5.84321	0.0712002	6.18245	0.0707448	5.89887	0.070588	6.22237	0.0718432	5.77586	0.0750634	6.47689	0.0746039	5.63361	0.0700307	5.69501	0.0709791	6.12632	0.0713034
				6.81621	0.0684593			5.99253	0.0737437	5.97594	0.0735235	5.85514	0.0734332	5.73992	0.0726157	6.11659	0.0724435	6.29406	0.0719999	5.93949	0.071442	5.94515	0.0720618	5.93276	0.0720567	5.86575	0.0713611	6.20309	0.0708867	5.91722	0.0707492	6.2401	0.0719687	5.79757	0.075272	6.50728	0.0747999	5.65586	0.0703457	5.71177	0.0711442	6.15291	0.071743
				6.90696	0.0681015			6.01157	0.0739176	5.99101	0.0736702	5.87281	0.0735896	5.76296	0.0728664	6.12982	0.0726013	6.31789	0.0722364	5.95252	0.0717535	5.95792	0.0722298	5.94775	0.072223	5.88424	0.0715571	6.22002	0.0710596	5.93228	0.0709456	6.25464	0.0721217	5.81537	0.0755263	6.53222	0.0750389	5.67412	0.0707297	5.72553	0.0713454	6.17473	0.0722787
				7	0.0677462			6.02571	0.074116	6.00221	0.0738375	5.88594	0.0737681	5.78008	0.0731524	6.13965	0.0727814	6.33559	0.0725061	5.96221	0.0721089	5.9674	0.0724214	5.95888	0.0724126	5.89799	0.0717808	6.23261	0.0712569	5.94347	0.0711698	6.26545	0.0722962	5.82861	0.0758164	6.55076	0.0753114	5.68768	0.0711677	5.73575	0.0715749	6.19094	0.0728898
				7	0.0677462			6.03442	0.0743312	6.00911	0.074019	5.89402	0.0739618	5.79063	0.0734628	6.1457	0.0729768	6.3465	0.0727988	5.96818	0.0724946	5.97324	0.0726293	5.96574	0.0726184	5.90645	0.0720235	6.24036	0.0714709	5.95036	0.071413	6.27211	0.0724855	5.83676	0.0761312	6.56217	0.0756072	5.69604	0.071643	5.74204	0.071824	6.20093	0.0735529
				IsoLine	IsoLine			6.03736	0.0745551	6.01144	0.0742078	5.89675	0.0741632	5.79419	0.0737856	6.14775	0.07318	6.35018	0.0731032	5.97019	0.0728957	5.97522	0.0728455	5.96805	0.0728325	5.90931	0.0722759	6.24298	0.0716935	5.95268	0.0716659	6.27435	0.0726824	5.83951	0.0764585	6.56603	0.0759148	5.69886	0.0721373	5.74417	0.0720831	6.2043	0.0742425
								ErrEll	ErrEll	ErrEll	ErrEll	ErrEll	ErrEll	ErrEll	ErrEll	ErrEll	ErrEll	ErrEll	ErrEll	ErrEll	ErrEll	ErrEll	ErrEll	ErrEll	ErrEll	ErrEll	ErrEll	ErrEll	ErrEll	ErrEll	ErrEll	ErrEll	ErrEll	ErrEll	ErrEll	ErrEll	ErrEll	ErrEll	ErrEll	ErrEll	ErrEll	ErrEll	ErrEll

## Sheet: monazite
A. M. Piechocka, J.-W.Zi, C. J Gregory, S. Sheppard & B. Rasmussen (2019). Australian Journal of Earth Sciences, 66, doi:10.1080/08120099.2019.1587644
Grain	238U	232Th	232Th	f206	238U/206Pb*		207Pb*/206Pb*		208Pb*/232Th		Disc	207Pb*/206Pb*
.spot	(ppm)	(ppm)	/238U	(%)	±1s		±1s		±1s		(%)	date (Ma) ±1s
GSWA 191938 garnet–biotite schist
main group
0673G.1-1	3217.33	70730.3	21.9841	0.0883	3.20484	0.0440008	0.110311	0.000616064	0.0880068	0.001889	2.98452	1804.54	10.1549
0673G.2-1	2883.51	75869.6	26.3116	0.0553	3.09501	0.039121	0.110143	0.000484275	0.0937255	0.002017	-0.171353	1801.77	7.99743
0673H.1-1	2966.99	53354.2	17.9826	0.1817	3.17406	0.0392005	0.109968	0.000451489	0.0932364	0.001975	1.85365	1798.87	7.47051
0673A.1-1	2008.03	130250	64.8646	0.0183	3.18732	0.0435414	0.109745	0.00072423	0.0903339	0.001971	2.00968	1795.18	12.0132
0673B.1-1	4607.75	46517.6	10.0955	0.0638	3.18846	0.0391707	0.109613	0.000405677	0.0890266	0.001914	1.92068	1792.99	6.73911
P01058 quartz–muscovite–tourmaline schist
older group
1005H.2-2	2289.05	60039.8	26.2291	0.0380294	3.26993	0.0362224	0.109551	0.000257481	0.0913569	0.00132917	4.01067	1791.96	4.28024
1005I.4-2	2108.17	28214.8	13.3835	0.0579248	3.21408	0.0567064	0.109416	0.000281579	0.0938717	0.00134355	2.42675	1789.7	4.68794
1005E.2-1	2012.08	38878.6	19.3226	0.0488752	3.30091	0.0462763	0.109359	0.000331747	0.0957323	0.0015606	4.63188	1788.76	5.52669
1005I.3-1	2402.85	51325.8	21.3604	0.0218657	3.20495	0.0346289	0.109235	0.000270627	0.0954935	0.00141551	2.01845	1786.69	4.51473
1005D.1-1	3470.92	77109.9	22.216	0.0459041	3.3765	0.046278	0.109215	0.000331887	0.0939859	0.00146302	6.38727	1786.36	5.53792
1005C.3-1	2424.04	50106.3	20.6706	0.0343497	3.21501	0.0332907	0.109114	0.000289783	0.0941191	0.00142	2.1771	1784.68	4.84084
1005J.1-1	3118.7	66705	21.3887	0.0455964	3.1285	0.035416	0.109012	0.000236443	0.095124	0.00137545	-0.28098	1782.97	3.95432
1005C.3-2	1984.37	49870.5	25.1317	0.0916645	3.35419	0.0472354	0.108948	0.000326059	0.0861446	0.00153601	5.60319	1781.9	5.45704
1005B.1-1	2259.06	25136.9	11.1272	0.0147401	3.22732	0.0363377	0.108907	0.000275696	0.0967866	0.00142896	2.31437	1781.21	4.61624
1005H.2-1	2426.79	33935	13.9835	0.0323589	3.26998	0.0354749	0.1089	0.000289929	0.0925475	0.00153378	3.42694	1781.1	4.85493
1005I.1-1	2488.64	34382.4	13.8158	0.0302184	3.20549	0.046681	0.108899	0.000455983	0.0967518	0.00129674	1.7242	1781.08	7.63568
1005G.1-1	2473.58	35372.8	14.3003	0.0302538	3.19786	0.036573	0.108894	0.000273194	0.0954319	0.00134371	1.51419	1780.99	4.57504
1005C.2-1	2571.8	41841.7	16.2695	0.030706	3.17199	0.0389204	0.10884	0.000257527	0.0964561	0.00157951	0.761297	1780.09	4.3153
1005F.2-1	2633.97	52995.1	20.1198	0.0607071	3.26461	0.0496309	0.108527	0.000513768	0.0924587	0.00141022	2.94659	1774.84	8.63941
1005E.1-1	2673.45	43606.4	16.3109	0.0445231	3.29601	0.0503809	0.108435	0.000278458	0.0924873	0.00127646	3.6746	1773.29	4.68739
1005C.1-1	2572.76	39548.9	15.3722	0.0264319	3.29556	0.0448772	0.108414	0.000258044	0.0965518	0.001723	3.64379	1772.94	4.34478
1005I.4-1	2508.68	30378.4	12.1093	0.0440917	3.14242	0.0321781	0.108385	0.000258681	0.0948535	0.0012968	-0.486001	1772.44	4.35695
1005F.1-1	2495.75	46880.4	18.7841	0.0516878	3.20978	0.0388786	0.108156	0.000430075	0.0934643	0.00139864	1.14565	1768.58	7.26254
Statistical Outlier/Pb loss
1005I.2-1	2682.74	19222.2	7.16515	0.0308984	3.12789	0.0349773	0.108036	0.000254783	0.094332	0.00131514	-1.2299	1766.56	4.30829
younger group
1005I.1-2	3338.33	32650	9.78034	0.0612179	3.19168	0.0777108	0.106373	0.00105803	0.0959895	0.00127293	-1.08288	1738.17	18.2349
1005J.1-2	5336.21	50274.1	9.42132	0.035567	3.42466	0.0440183	0.10598	0.000194449	0.0885445	0.00123824	4.61315	1731.39	3.36657
1005J.2-1	3406.89	42681.7	12.5281	0.111938	3.24539	0.037911	0.1048	0.000602711	0.0951782	0.00147667	-1.20892	1710.81	10.5798
f206 > 1%
1005H.1-1	1993.45	55963.6	28.0737	1.64226	3.08358	0.0574336	0.111566	0.00863527	0.0909935	0.00155249	0.788709	1825.08	140.385
219708 garnet–biotite pelitic gneiss
older group
1605G.1-1	1709.96	25773.4	15.0725	0.0238094	3.09226	0.136093	0.109245	0.000273826	0.108406	0.00665058	-1.08554	1786.86	4.56759
1605B.1-1	2309.78	32350.9	14.006	0.0282148	3.00216	0.130884	0.109109	0.000221724	0.113932	0.00691868	-3.85337	1784.59	3.70413
1605K.1-1	5033.39	35603.9	7.07355	0.00426847	3.02841	0.133219	0.109099	0.00032585	0.107027	0.00658838	-3.07989	1784.42	5.44427
1605H.1-1	2377.34	29573.7	12.4398	0.10461	3.08332	0.134094	0.108792	0.000400896	0.105502	0.0065063	-1.7724	1779.28	6.72131
1605J.1-1	2709.9	35806.8	13.2133	0.0205283	2.8431	0.133687	0.108785	0.000740981	0.122267	0.0076068	-9.19948	1779.18	12.424
1605E.1-1	3933.85	33801.3	8.59244	0.0277745	2.90489	0.12677	0.108392	0.000192765	0.113767	0.00698151	-7.58833	1772.56	3.24646
1605L.1-1	7748.9	28314.8	3.65404	0.00671452	3.0943	0.138249	0.108392	0.000306831	0.107975	0.00676925	-1.84153	1772.57	5.16749
1605A.1-1	3686.88	31903.5	8.65327	0.0214795	2.9805	0.132518	0.108105	0.000453202	0.112114	0.00687505	-5.50607	1767.72	7.65751
1606K.1-1	5892.39	40126.3	6.80986	0.0165621	3.0334	0.118014	0.10738	0.000958281	0.0962626	0.00379023	-4.63254	1755.43	16.3257
1606I.1-1	4446.96	41660.9	9.3684	0.0843796	3.06441	0.120494	0.107245	0.000641195	0.0892249	0.0034309	-3.84598	1753.13	10.9406
younger group
1606B.1-1	4937.11	48287.1	9.78044	0.0336402	3.08672	0.122127	0.107496	0.000334536	0.0850373	0.00328901	-2.94073	1757.4	5.69178
1606G.1-1	3211.74	45634.4	14.2086	0.0447338	3.17614	0.123345	0.106408	0.00042503	0.0856086	0.00332302	-1.48027	1738.78	7.32233
Excluded imprecise 7/6
1606F.1-1	3014.77	59190.8	19.6336	0.084466	3.24516	0.306594	0.104971	0.00458256	0.0819012	0.00654775	-1.03867	1713.8	80.2801
1606C.1-1	5816.16	55203.5	9.4914	0.0424795	3.30491	0.148953	0.103365	0.00502407	0.0801466	0.00330376	-1.10893	1685.4	89.7038
Discrodance > 8 %
1605D.1-1	4645.46	34585.6	7.44505	0.0136215	2.99345	0.144208	0.105291	0.00368373	0.103796	0.00720555	-8.06366	1719.4	64.2923
1605J.1-2	3609.55	35302.7	9.78037	0.0356037	3.09438	0.231534	0.100571	0.00641489	0.109945	0.0086553	-10.4309	1634.67	118.485
1605F.1-1	5005.83	40881.9	8.16686	0.00458128	3.85467	0.343221	0.100494	0.00433022	0.070553	0.00614554	8.95998	1633.24	80.0563
Notes:
Pb* indicates radiogenic Pb (i.e. corrected for common Pb)
f206, proportion of common 206Pb in measured 206Pb, determined using measured 204Pb/206Pb and contemporaneous common Pb composition (Stacey and Kramers, 1975)
Disc. is apparent discordance, as D (%) = 100 x ([207Pb*/206Pb* date] – [238U /206Pb* date]) / [207Pb*/206Pb* date]
Analytical uncertainities from the mulitple sessions have been applied to the data during data reduction.
Analyses are sorted by descending 207Pb*/206Pb* age for all samples

## Sheet: xenotime
A. M. Piechocka, J.-W.Zi, C. J Gregory, S. Sheppard & B. Rasmussen (2019). Australian Journal of Earth Sciences, 66, doi:10.1080/08120099.2019.1587644
Grain	238U	232Th	232Th	f206	238U/206Pb*		207Pb*/206Pb*		208Pb*/232Th		Disc	207Pb*/206Pb*
.spot	(ppm)	(ppm)	/238U	(%)	±1s		±1s		±1s		(%)	date (Ma) ±1s
GSWA 219706 quartz–muscovite schist
older group
NP1604F.1-10	16273.2	24312.8	1.49404	0.0440238	3.22451	0.0635631	0.11154	0.00033759	0.0893111	0.00954325	4.56751	1824.66	5.48979
NP1604F.1-11	18270.4	11667.6	0.638606	0.0479064	3.2789	0.0714321	0.11044	0.000473452	0.0705795	0.00949798	5.0202	1806.66	7.79301
NP1604F.1-2	15447	13978.7	0.904943	0.0632065	3.21743	0.126429	0.110354	0.00125388	0.0513284	0.00966448	3.35516	1805.24	20.6584
NP1604F.1-1	19290.2	9746.52	0.505258	0.0224932	3.01736	0.0984055	0.110155	0.0011327	0.0942132	0.0102402	-2.40159	1801.96	18.7032
younger group
NP1604F.1-7	10766.8	12101.2	1.12394	0.0849472	3.448	0.130086	0.107463	0.000668778	0.076132	0.00934429	6.55713	1757	11.3828
NP1604F.1-12	11570.3	11831.9	1.0226	0.131303	3.32741	0.0721871	0.106299	0.000864725	0.0452631	0.00975276	2.47242	1736.9	14.9161
disc. >5% and f206 > 1%
NP1604F.1-8	21203.1	16421.7	0.774492	-0.00137461	3.94533	0.313254	0.111656	0.00187309	0.0721074	0.00797305	20.2695	1826.55	30.4211
NP1604F.1-5	18278.8	8833.45	0.483261	0.0273237	3.58758	0.11357	0.110446	0.00176904	0.0823479	0.00877271	12.2729	1806.75	29.1164
NP1604F.1-6	28609.7	26526.9	0.9272	0.091266	5.18316	0.199414	0.109063	0.00119762	0.0370799	0.00637529	36.2471	1783.83	20.0178
NP1604F.1-3	11034.8	15194.2	1.37693	0.351024	5.69757	0.225022	0.106624	0.00112511	0.0282811	0.00598234	40.1766	1742.49	19.335
NP1604F.1-13	11388.3	16280.2	1.42956	1.47819	5.47425	0.0932178	0.104735	0.00100322	0.0252446	0.00632618	36.7382	1709.66	17.6238
NP1604F.1-9	9314.67	11696	1.25566	0.0698182	3.87892	0.0761526	0.104525	0.000546202	0.049528	0.00866714	13.3286	1705.98	9.61896
NP1604F.1-4	18929.6	10617.2	0.560878	0.0085427	4.05477	0.230404	0.102162	0.00115228	0.0700864	0.0085411	14.589	1663.76	20.8734
Notes:
Pb* indicates radiogenic Pb (i.e. corrected for common Pb)
f206, proportion of common 206Pb in measured 206Pb, determined using measured 204Pb/206Pb and contemporaneous common Pb composition (Stacey and Kramers, 1975)
Disc. is apparent discordance, as D (%) = 100 x ([207Pb*/206Pb* date] – [238U /206Pb* date]) / [207Pb*/206Pb* date]
Analytical uncertainities from the mulitple sessions have been applied to the data during data reduction.
Analyses are sorted by descending 207Pb*/206Pb* age for all samples

## Sheet: Sheet2
A. M. Piechocka, J.-W.Zi, C. J Gregory, S. Sheppard & B. Rasmussen (2019). Australian Journal of Earth Sciences, 66, doi:10.1080/08120099.2019.1587644
Sample	no. spots	no. crystals	age
older group
This study
P01058	19	16
191938	5	5
219708	5	5
219706	4	1
Published data
187403	4	4
184160	1	1
88475mz	24	10
88475xn	4	1
younger group
This study
P01058	3	2
219708	2	2
219706	2	1
Published data
88475xn	1	1
1005B.1-1
1005C.1-1
1005C.2-1
1005C.3-1
1005C.3-2
1005D.1-1
1005E.1-1
1005E.2-1
1005F.1-1
1005F.2-1
1005G.1-1
1005H.2-1
1005H.2-2
1005I.1-1
1005I.2-1
1005I.3-1
1005I.4-1
1005I.4-2
1005J.1-1
